1 **A dual functioning small RNA/Riboswitch controls the expression of the methionine**  
2 **biosynthesis regulator SahR in *Desulfovibrio vulgaris* Hildenborough**

3 **M. L. Kempher<sup>1,3</sup>, A. S. Burns<sup>1,3</sup>, P. S. Novichkov<sup>2,3</sup>, and K. S. Bender<sup>1,3\*</sup>**

4 <sup>1</sup> Department of Microbiology, Southern Illinois University, Carbondale, IL, 62901, USA

5 <sup>2</sup> Environmental Genomics and Systems Biology, Lawrence Berkeley National Laboratory, Berkeley, CA,  
6 94720, USA

7 <sup>3</sup> ENIGMA– Ecosystems and Networks Integrated with Genes and Molecular Assemblies, Berkeley, CA,  
8 USA

9 \*To whom correspondence should be addressed. Tel: 618-453-2868, Fax: 618-453-8036, Email:

10 [bender@micro.siu.edu](mailto:bender@micro.siu.edu)

11

12 **ABSTRACT**

13 Riboswitches are *cis*-acting RNA regulatory elements that control expression of a  
14 downstream gene(s) by directly binding to a specific metabolite. Here we report a *S*-  
15 adenosylmethionine (SAM)-I riboswitch in the sulfate-reducing bacterium *Desulfovibrio*  
16 *vulgaris* Hildenborough (*DvH*) that plays an additional regulatory role as a *trans* small  
17 noncoding RNA (sRNA) targeting the methionine biosynthesis cycle transcriptional  
18 regulator SahR. Sequence and expression analyses indicated that DseA (*Desulfovibrio*  
19 *SAM element A*) is located upstream of a small hypothetical protein DVU1170 and that  
20 the two are co-transcribed. Multiple techniques were used to verify the riboswitch  
21 activity of DseA and its activity as a transcriptional terminator in response to SAM.  
22 While determining a potential role for DseA in the methionine biosynthesis pathway, a  
23 mRNA target encoding SahR was identified. Subsequent electrophoretic mobility shift  
24 assays confirmed the ability of DseA to bind the *sahR* transcript and qRT-PCR analysis  
25 of a DseA deletion strain suggested a negative regulatory role. This study presents the

26 first regulatory role for a newly discovered sRNA in *Desulfovibrio*. Additionally, this  
27 study suggests that DseA acts not only as a riboswitch, but also as a *trans* regulatory  
28 molecule.

29 **IMPORTANCE** Sulfate-reducing bacteria (SRB) are important contributors to global  
30 geochemical cycles while also causing major issues for the petroleum and oil industry  
31 due to biocorrosion and souring of oil wells. Despite their significance, gene regulatory  
32 networks and pathways remain poorly understood in SRB. Here, we report a *trans* acting  
33 small noncoding RNA that plays a dual role as a SAM sensing riboswitch that controls  
34 the expression of a small hypothetical protein. Our findings provide important insights  
35 into the regulatory repertoire of sulfate-reducing bacteria.

## 36 **INTRODUCTION**

37 Microorganisms living outside of the laboratory environment encounter an ever-  
38 changing landscape of nutrient levels and physiological conditions. Bacteria have  
39 evolved intricate systems for regulating their internal response to external stimuli to  
40 ensure survival. The importance of regulation by protein factors has been known for  
41 many decades. However, the extent to which regulation by both *trans* and *cis* acting RNA  
42 has recently become more evident as the use of RNA to regulate expression allows for a  
43 quick and transient response to environmental cues in comparison to regulatory proteins.  
44 Thus, both small noncoding RNAs (sRNAs) and riboswitches have been shown to be  
45 extremely important players in many bacterial regulatory pathways (1-8).

46 The central role played by sRNAs in regulatory networks has become apparent  
47 over the last decade in many types of bacteria. In *E. coli* over 100 sRNAs have been  
48 confirmed (9,10). sRNAs have been identified and characterized in many bacterial

49 genomes including pathogens like *Yersinia pestis*, *Francisella tularensis*, and *Listeria*  
50 *monocytogenes* and environmentally relevant Alphaproteobacteria like *Sinorhizobium*  
51 *meliloti*, *Bradyrhizobium japonicum*, and *Rhodopseudomonas palustris* (11-16). sRNAs  
52 have been shown to regulate numerous stress responses in bacteria including oxidative  
53 stress, osmotic stress, carbon starvation, iron starvation, photooxidative stress, and  
54 glucose-phosphate accumulation (17-22). Most sRNAs act post-transcriptionally by  
55 binding to target mRNAs and regulating expression. Often a sRNA base-pairs to the 5'  
56 untranslated region (UTR) of a mRNA and blocks ribosome access inhibiting translation  
57 (19). Less reported modes of regulation include activation of translation of a mRNA by  
58 inducing secondary structure changes or sequestration of a protein target (23-26).

59       Beyond regulation by *trans*-acting RNA molecules, several *cis*-regulatory  
60 elements are also present in many bacteria. Riboswitches are elements usually found near  
61 the 5' end of nascent RNA molecules that can fold into two mutually exclusive secondary  
62 structures based on cellular concentrations of certain metabolites (27,28). Which structure  
63 is formed determines the fate of a downstream gene(s) by either forming a transcriptional  
64 terminator or affecting translation initiation. Many classes of riboswitches are known that  
65 sense a number of different small metabolites. The genes that are controlled by  
66 riboswitches are generally involved in the synthesis or uptake of the metabolite being  
67 sensed (27,28).

68       Six different classes of *S*-adenosylmethionine (SAM) sensing riboswitches have  
69 been implicated to control genes of the methionine biosynthesis cycle in different bacteria  
70 (29,30). Methionine is not only important for protein initiation and synthesis, but it is also  
71 the precursor to SAM. SAM is important in the bacterial cell as a methyl donor in a

72 myriad of reactions by methyl transferases that are important in nucleic acid, protein, and  
73 lipid modifications. The end product of methylation reactions is s-adenosylhomocysteine  
74 (SAH), which binds to methyltransferases with greater affinity than SAM and thereby  
75 inhibits their ability to further methylate (31). It is for this reason that it is important to  
76 quickly recycle SAH and keep levels of SAM high enough to carry out necessary  
77 methylation reactions.

78 Many bacteria can make methionine *de novo* (31,32). This pathway in well-  
79 studied bacteria is tightly regulated through a complex feedback loop. Some bacteria do  
80 not employ any riboswitches to control methionine biosynthesis and instead use both  
81 activator and repressor proteins that have been shown to interact with SAM, SAH, or  
82 homocysteine (31-33). Despite the breadth of characterized regulators in the methionine  
83 pathway, many bacteria lack annotated riboswitches or homologs to any identified  
84 methionine regulatory proteins. Of particular importance to this study is the recently  
85 identified transcriptional regulator SahR, which seems to play a role in regulation of  
86 methionine biosynthesis genes in both Alphaproteobacteria and Deltaproteobacteria (34).

87 Recently, we identified several novel sRNAs in the sulfate-reducing bacterium  
88 *Desulfovibrio vulgaris* Hildenborough (*DvH*) using high-throughput RNA sequencing.  
89 Determining the exact biological roles of these candidates has lagged behind due to  
90 limited molecular tools in *DvH*. While investigating the potential role of one of the  
91 candidates it was determined to contain a SAM-I riboswitch domain. Here we report a  
92 novel *trans*-acting sRNA, DseA (*Desulfovibrio* SAM element A), which was found to not  
93 only target the mRNA of the newly discovered transcriptional regulator of SAM cycle  
94 genes (SahR), but to also function as a SAM sensing riboswitch for a small hypothetical

95 protein. This is the first report linking a sRNA in *DvH* to a regulatory role and a further  
96 step in the elucidation of methionine biosynthesis in *Desulfovibrio*. These findings  
97 expand our knowledge of the repertoire of regulatory mechanisms utilized by *DvH*.

## 98 **RESULTS**

### 99 **Identification of DseA sRNA**

100 A previous study in this laboratory identified potential sRNA candidates using  
101 high-throughput RNA sequencing (manuscript in preparation). The predicted coordinates  
102 of candidate DseA were 1,264,233 – 1,264,174 on the negative strand of the *DvH*  
103 genome. Northern blot analysis using a 30-mer probe targeting this region verified the  
104 expression of a transcript around ~150 nt in both exponential and stationary growth  
105 phases (Figure 1A). Circular RACE was performed on *DvH* RNA with primers specific  
106 for DseA (Table S2). The majority (90%) of RACE clones sequenced determined DseA  
107 to be 164 nt in length with coordinates of 1,264,319 – 1,264,156 on the negative strand  
108 (Figure S1). The 3' end of the determined transcript contains an inverted repeat and a  
109 string of uracils, which is common for intrinsic terminators (Figure 1B). Consensus  
110 sequences of promoters have been identified for *DvH* for the sigma factors  $\sigma^{70}$ ,  $\sigma^{54}$ , and  
111  $\sigma^{28}$  (35). Upon visual inspection it was determined that DseA contains a promoter for  $\sigma^{70}$   
112 that comprises 9% of the total promoters thus far identified in *DvH* (Figure 1B; (35)). A  
113 small hypothetical protein (DVU1170) and a methyl-accepting chemotaxis protein  
114 (DVU1169) are located downstream of DseA, while an integral membrane protein  
115 (MviN-1) is located upstream on the opposite strand (Figure 1C; MicrobesOnline (36)).

### 116 **Conservation of DseA and Identification of a SAM-I riboswitch domain**

117 The NCBI Basic Local Alignment Search Tool (BLAST) was used to search for  
118 conservation of DseA in other organisms. Similar sequences were found in *Desulfovibrio*  
119 *alaskensis* G20 (82% identical), *Desulfovibrio salexigens* DSM 2638 (83% identical), and  
120 *D. vulgaris* strains RCH1 (100% identical), DP4 (100% identical), and Miyazaki F (76%  
121 identical) (Figure S2). Noncoding RNA elements can often have similar structures  
122 regardless of primary structure. Therefore, the Rfam database (37) was used to search for  
123 structural homologs of DseA. This search resulted in the identification of a SAM-I  
124 riboswitch element within DseA (Figure S3). This predicted SAM riboswitch element  
125 contained an intrinsic terminator and suggested the mode of regulation to be that of  
126 transcription termination. Therefore, a small transcript would result during the “off” state  
127 and a longer transcript would result from read-through of the terminator in the “on” state.

128 Because a small transcript had already been confirmed by Northern blot analysis,  
129 but a larger transcript had not been observed using our methods, we further investigated  
130 the potential of DseA to act as a SAM-I riboswitch controlling the expression of the  
131 downstream gene DVU1170. Reverse-transcriptase PCR (RT-PCR) was used to confirm  
132 the presence of a larger transcript corresponding to read-through of the predicted DseA  
133 terminator into the 189 nt DVU1170 (located 129 nt downstream of the predicted  
134 riboswitch; Figure 1C). Additional primer sets spanning the region between DseA and  
135 DVU1170 confirmed co-transcription (Figure S4A). Additionally, DVU1170 was not  
136 predicted to be part of an operon and this was confirmed by RT-PCR using primers  
137 designed to anneal to the downstream gene DVU1169 (Figure S4B).

### 138 **Expression of DVU1170**

139           The read-through transcript of DVU1170 was impossible to visualize via  
140 Northern Blot analysis. Therefore, qRT-PCR was used to monitor the presence of the  
141 read-through transcript of DVU1170 during growth with or without added methionine.  
142 SAM is synthesized from methionine and an increase in methionine levels has been  
143 shown in other bacteria to lead to an increase of SAM levels inside of the cell (38).  
144 Additionally, it is unknown if *DvH* can uptake SAM directly from the growth medium  
145 despite the computational prediction of a methionine transporter (31). Therefore, qRT-  
146 PCR was performed on RNA extracted from *DvH* cultures that had been grown to early  
147 exponential phase, separated into two, and then either spiked with 1 mM methionine or  
148 an equal volume of degassed H<sub>2</sub>O. RNA was taken at 5, 15, 30, 60, and 120 min post  
149 separation. qRT-PCR was done using RNA from each time-point and normalized using  
150 the 16S rRNA transcript. Levels of DVU1170 transcript dropped after the addition of  
151 methionine by 2.97-fold at 5 min and up to a 3.47-fold decrease at 15 min compared to  
152 the sample without methionine at the same time-point (Figure 2). These data suggest that  
153 levels of DVU1170 expression are influenced by concentrations of methionine.

#### 154 **Direct binding of SAM to the DseA riboswitch**

155           SAM riboswitches directly bind SAM while discriminating against very  
156 structurally similar compounds like methionine and SAH. Upon binding by SAM,  
157 structural rearrangements occur in the expression platform (39). The first 165 nt of the  
158 DVU1170 UTR was *in vitro* transcribed and subjected to in-line probing which reveals  
159 locations of structured versus unstructured RNA based on differing rates of spontaneous  
160 cleavage of RNA. RNA phosphodiester linkages are cleaved by the ribose 2' oxygen on  
161 the adjacent phosphorus and the rate of this reaction depends on the “in-line” position of

162 the 2' oxygen, phosphorus, and 5' leaving group (40). RNA samples were mixed with 0.1  
163 mM, 0.5 mM, and 1 mM SAM and compared to a sample with no additional factors, 1  
164 mM methionine, or 1 mM SAH. There were several regions of the RNA where scission  
165 either increased or decreased based on the addition of SAM indicating a difference in  
166 structural conformation (Figure 3A). The areas indicated with an arrow labeled 1, 2, 4, or  
167 5 had increased scission in the presence of SAM based on lane profiles obtained for each  
168 sample while arrows marked with 3, 6, or 7 indicated decreased scission in the presence  
169 of SAM. No differences were observed between the negative control, the methionine  
170 sample, or the SAH sample. The lane profiles were normalized based on total signal and  
171 then plotted as intensity versus lane position (Figure 3B). These findings validate that the  
172 structural rearrangement is specific to SAM and not affected by methionine or SAH.

173 The data from the in-line probing analysis were used to draw a probable  
174 secondary structure using the RNA structure visualization program VARNA (41). The  
175 structural model is consistent with other characterized SAM-I structures and indicated an  
176 anti-terminator to form in the absence of SAM and a terminator stem loop to form in the  
177 presence of SAM (Figure 3C; (42)).

### 178 **SAM promotes transcription termination *in vitro***

179 Previous studies have indicated that riboswitches can act at the level of  
180 transcription termination or translation initiation (27,43). While the predicted DseA  
181 riboswitch region contains a characteristic intrinsic terminator (G + C rich region  
182 followed by a series of uracils), suggesting that the riboswitch functions at the level of  
183 transcription termination, single-round *in vitro* transcription termination assays were  
184 carried out to determine if the addition of SAM affected the amount of transcription



185 termination. These assays were performed by linking the *DvH* DseA region, including the  
186 predicted terminator and ~184 nt downstream, to a T7A1 promoter recognized by *E. coli*  
187 RNAP. If termination does not occur, then the RNA polymerase will continue to  
188 transcribe the DNA until it reaches the end of the template and falls off (“read-through”  
189 transcription).

190 A single mixture of halted complexes was created before being separated and  
191 mixed with various amounts of SAM or methionine. When no additional factors were  
192 added to the mixture a termination rate of 52% was observed (Figure 4A, lane 1). The  
193 termination frequency increased to 63% and 82% when 0.1 mM and 0.5 mM of SAM  
194 was added, respectively (Figure 4A, lanes 2 and 3). When 0.5 mM of methionine was  
195 added a termination rate of 55% was observed which was similar to the negative control  
196 (Figure 4A, lane 4). These findings indicate that upon SAM binding, the anti-terminator  
197 sequence is sequestered, and an intrinsic terminator is formed instead halting  
198 transcription. These data also indicate the response to SAM is specific since methionine  
199 had no effect on termination.

#### 200 **Transcriptional fusion of the DseA promoter and predicted riboswitch to *lacZ***

201 SAM riboswitches have shown a large range of variation in their response to  
202 different levels of SAM *in vitro* (38). Transcriptional *lacZ* fusions were made to  
203 determine if transcription termination also increased *in vivo*. Currently, no reporter gene  
204 system is available for *DvH*. Therefore, the fusions were made in an *E. coli* background.  
205 The predicted promoter for DseA and the entire riboswitch region were ligated into  
206 pRS415 directly in front of a promoterless *lacZ* gene and transformed into *E. coli*. As *E.*  
207 *coli* cells are unable to uptake SAM directly, methionine was used to act as a SAM

208 precursor. The strain containing the DseA-*lacZ* fusion and a control strain with empty  
209 vector were grown in minimal media containing 1 mM methionine to early exponential  
210 phase, separated into two different cultures, centrifuged, and resuspended in minimal  
211 media with or without 1 mM methionine. After 3 h of growth the samples were assayed  
212 for  $\beta$ -galactosidase production.

213 The negative control strain containing the empty pRS415 vector produced 1.09  
214 Miller Units (MU) without added methionine and 1.32 MU with added methionine. The  
215 strain containing the pRS415-DseA vector produced 230.48 MU without additional  
216 methionine and 88.7 MU with added methionine indicating a 2.5-fold decrease in  $\beta$ -  
217 galactosidase production after the addition of methionine (Figure 4B). These findings  
218 provided further evidence that transcription of DVU1170 is regulated in response to  
219 methionine concentrations in *E. coli*.

## 220 **Prediction of a mRNA target of the DseA sRNA**

221 In all the conditions tested (rich media, minimal media, H<sub>2</sub>O<sub>2</sub> stress, salt stress,  
222 and cells grown in a biofilm) the terminated DseA product was abundant, even after  
223 several hours of growth (data not shown). This indicated that perhaps the terminated  
224 product was playing an additional role. One riboswitch has been shown to also act in  
225 *trans* as a sRNA inhibiting a mRNA target (44). Thus we used the computational  
226 prediction program IntaRNA to compile a list of potential mRNA targets of DseA (Table  
227 S3; (45)). One of the top target candidates was the mRNA for SahR (DVU0606), which  
228 had recently been shown to act as a transcription factor that controls the known  
229 methionine biosynthesis and SAM cycle genes in *DvH* and other Deltaproteobacteria  
230 (34).

231           Since SAM riboswitches are known to play a role in the methionine biosynthesis  
232 cycle in other bacteria we decided to investigate the possibility of DseA targeting the  
233 *sahR* mRNA. The predicted base pairing between DseA and the *sahR* mRNA blocks the  
234 ribosome binding site and the start codon likely inhibiting translation of *sahR* (Figure  
235 5A).

236 **DseA sRNA and *sahR* 5' UTR directly interact *in vitro*.**

237           Full length DseA and the 5' UTR of *sahR* were synthesized to validate a direct  
238 interaction between the two molecules using an electrophoretic mobility shift assay  
239 (EMSA). The 5' portion of *sahR*, corresponding to the -31 to +168 nucleotides relative to  
240 the start codon of *sahR* mRNA, was *in vitro* transcribed and radiolabeled at the 5' end.  
241 DseA was also *in vitro* transcribed but was not radiolabeled. The two RNA molecules  
242 were mixed together and then analyzed by native-PAGE analysis. A sample with only the  
243 *sahR* RNA showed the migration pattern of free *sahR*. When DseA was added this band  
244 shifted up confirming the interaction of the two RNA molecules (Figure 5B). Another  
245 sRNA identified in a previous study was used as a control RNA (Dv sRNA2) and no shift  
246 was seen when this RNA was added with *sahR* instead of DseA.

247           An additional EMSA analysis was done on smaller portions of the *sahR* mRNA to  
248 determine the exact nucleotides involved in binding (Figure S5). An RNA oligo that  
249 corresponded to the nucleotide positions of -31 to +46 relative to the start codon of *sahR*  
250 mRNA was sufficient to bind to DseA and show a shift. A region that corresponded to  
251 the nucleotide positions +17 to +88 relative to the start codon of *sahR* mRNA did not  
252 shift. This confirmed that the predicted region of interaction near the RBS and start codon  
253 of *sahR* is required for interaction with DseA.

## 254 **DseA sRNA controls expression of *sahR* mRNA**

255           Since DseA was predicted to bind to the RBS of the *sahR* mRNA, it seemed likely  
256 that the mode of regulation of the sRNA would be to block translation of *sahR* which can  
257 often lead to degradation of the targeted mRNA (46,47). To investigate this, the levels of  
258 *sahR* transcript were evaluated in a DseA deletion mutant ( $\Delta dseA$ ) and compared to wild-  
259 type levels. qRT-PCR was done on RNA extracted from both exponential growth and  
260 stationary growth of wild-type *DvH* and the  $\Delta dseA$  strain. The level of the *sahR* transcript  
261 was higher in the  $\Delta dseA$  strain suggesting that the mode of action of DseA is inhibitory  
262 (Figure 6A). The expression of *sahR* increased 1.48-fold during exponential growth and  
263 almost 20-fold during stationary growth in the  $\Delta dseA$  strain. In order to exclude the  
264 possibility that the changes in expression were due to inactivation of the downstream  
265 gene DVU1170, a complement strain was constructed that expressed only DseA from a  
266 constitutive promoter. Expression from this promoter resulted in higher levels of  
267 expression of DseA than compared to the wild-type strain. Expression of *sahR* was  
268 significantly down regulated in the complement strain further suggesting an inhibitory  
269 role for DseA.

## 270 **Additional putative targets of DseA**

271           Typically, sRNA-target interactions are confirmed *in vivo* via systems that link  
272 expression of the mRNA target to a reporter gene (either chromosomally or on a plasmid)  
273 and then placing the sRNA behind an inducible promoter on a vector (48). Unfortunately,  
274 no such system exists for *DvH*. We, therefore, attempted to heterologously express DseA  
275 and *sahR* using a system in *E. coli* where the mRNA target is chromosomally inserted  
276 behind an inducible promoter and translationally fused to *lacZ* in strain PM1205 (49,50).

277 The sRNA is then expressed behind an inducible promoter from a vector. However, we  
278 were unable to get appreciable levels of expression of the *sahR-lacZ* fusion (~12% of the  
279 amount we were able to obtain with the 5' end of the *E. coli manX* mRNA fused to *lacZ*;  
280 data not shown), possibly due to slight differences in ribosome binding sites between *E.*  
281 *coli* and *DvH*. Therefore, to provide further evidence to support the putative role of DseA  
282 as a regulatory sRNA, we performed qRT-PCR on additional IntaRNA predicted mRNA  
283 targets (Table S3). Eight of the top predicted targets were selected for analysis.  
284 Additionally, the entire list of predicted targets was manually searched for any genes that  
285 had been identified as part of the methionine biosynthesis pathway. A recent study  
286 identified that a DUF39 protein was required for homocysteine formation in  
287 *Desulfovibrio alaskensis* (51). The homolog of this gene in *DvH*, DVU2398, was a  
288 predicted target of DseA and was included in the qRT-PCR analysis. Of the nine genes  
289 analyzed, seven showed a significant difference in expression between the wild-type and  
290 the  $\Delta dseA$  strain (Figure 6B). Furthermore, expression of the affected genes was either  
291 restored to similar levels observed in the wild-type strain or down-regulated to a greater  
292 extent in the complement strain indicating the observed effect was due to DseA and not  
293 the downstream gene DVU1170.

## 294 **DISCUSSION**

295 Regulation of gene expression by both *trans* acting sRNAs and *cis* acting  
296 riboswitch elements has been implicated in numerous nutritional regulatory networks.  
297 This study is the first in *Desulfovibrio* to both examine the mechanism of a SAM  
298 riboswitch and suggest a definitive role for a sRNA.

299           While a previous study had predicted the presence of riboswitches such as  
300 thiamine and vitamin B<sub>12</sub> elements in *Desulfovibrio*, no SAM riboswitch was identified  
301 (33). The DseA element was likely overlooked in this study as only regions linked to  
302 genes predicted to be involved in methionine biosynthesis were analyzed. Characterized  
303 SAM-I riboswitches from other bacteria have been shown to bind SAM but discriminate  
304 against methionine and other similar metabolites (39). Results from the in-line probing  
305 assay suggested changes in secondary structure occur when SAM is present but not when  
306 methionine or SAH is present (Figure 3). The specificity of the RNA transcript to bind to  
307 SAM but not to methionine or SAH agrees with previous evidence that SAM  
308 riboswitches are highly specific to SAM as their sole metabolite. Analysis of *in vitro*  
309 transcription termination in the presence or absence of SAM assays also indicated that a  
310 significant increase in termination occurred when SAM was added but not in the presence  
311 of methionine (Figure 4A). This provides further evidence that the DseA riboswitch is  
312 specific for SAM and that it acts at the level of transcription termination.

313           Transcriptional *lacZ* fusions in *E. coli* further corroborated that *in vivo* changes  
314 occurred in response to methionine concentrations as samples without methionine  
315 showed greater  $\beta$ -galactosidase activity compared to samples with methionine (Figure  
316 4B). These data suggest that increased levels of methionine lead to lower levels of the  
317 downstream gene. Even with added methionine the complete inhibition of  $\beta$ -  
318 galactosidase was not seen. Perhaps tighter control would be seen with greater amounts  
319 of methionine or with *in vivo* studies in *DvH* as opposed to *E. coli*.

320           In this study we showed that DseA can also bind to *sahR* (DVU0606) mRNA *in*  
321 *vitro*, providing further support that DseA acts as both a SAM responsive riboswitch and

322 a *trans* acting sRNA (Figure 5). The region surrounding the RBS and start codon of the  
323 *sahR* transcript is necessary for DseA binding to occur and this suggested the mode of  
324 regulation to be inhibitory (Figure S5). Comparison of *sahR* transcript levels in a DseA  
325 deletion mutant to those of the wild-type supported this hypothesis (Figure 6). RNA  
326 extracted from the deletion strain of DseA showed an almost 20-fold increase in the level  
327 of expression of *sahR* during stationary phase. Seven additional predicted targets of DseA  
328 showed a similar pattern of increased expression in the DseA deletion strain. Of  
329 particular interest was the increased expression of DVU2938 in the DseA deletion strain.  
330 DVU2938 homologs in two separate *Desulfovibrio* species have recently been shown to  
331 be involved in the methionine biosynthesis pathway (51,52). These recent studies suggest  
332 that the corresponding proteins in *D. alaskensis* G20 (Dde\_3007) and *D. miyazaki*  
333 (DVMF\_1464) can transfer a sulfur group to *O*-phosphohomoserine to form  
334 homocysteine in the pathway for methionine biosynthesis. Thus, providing further  
335 evidence for a regulatory role of DseA related to the methionine biosynthesis pathway.

336 While it remains to be seen whether the change in expression observed for  
337 predicted DseA targets is due to direct binding of DseA or from a downstream effect  
338 from other regulators controlled by DseA, it is clear that DseA is playing some role in  
339 altering the expression of these genes. Whether or not a link between these additional  
340 predicted targets and regulation of the methionine biosynthesis cycle exists is beyond the  
341 scope of this present study. However, we do aim to explore the global regulatory role of  
342 DseA in future studies.

343 It should be noted that in the *Desulfovibrio* species in which DseA is conserved,  
344 the riboswitch is linked to homologs of the hypothetical protein DVU1170 (Figure 1C).

345 We confirmed that DVU1170 is co-transcribed with DseA in *DvH* and that transcript  
346 levels of DVU1170 are higher in the absence of exogenous methionine (Figures 2 and  
347 S4A). This longer transcript was only slightly visible in Northern blot analysis compared  
348 to terminated DseA under every growth condition tested. It remains to be seen if  
349 DVU1170 expression is always low compared to DseA or if the condition in which  
350 expression increases was not established in this study. While it is tempting to predict a  
351 novel role for DVU1170 in the methionine biosynthesis pathway of *Desulfovibrio*, a  
352 more focused study targeting the activity of DVU1170 will need to be done before a role  
353 for the protein *in vivo* can be determined.

354 Based on this study and previous data showing that SahR negatively regulates  
355 genes in the SAM cycle (34), we have constructed the model presented in Figure 7. This  
356 model suggests that when SAM concentrations are high, more premature transcription  
357 termination occurs before reaching the downstream DVU1170 gene. This would increase  
358 the levels of DseA as a *trans* acting sRNA, allowing DseA to bind to *sahR* mRNA and  
359 alter its expression. When the cell experiences high levels of SAM, it is an indicator that  
360 very high levels of SAH will soon follow. SAH is toxic and must be eliminated quickly.  
361 Decreasing the amount of the transcription factor SahR leads to derepression of genes  
362 (*ahcY*, *metE*, and *metK*) that encode products essential for recycling SAH back to SAM.  
363 However, additional experiments will need to be carried out to verify the relationship of  
364 DseA and *sahR*.

365 Overall, new studies are showing a myriad of regulatory roles for riboswitches  
366 (5,53). In fact, recent reports have shown that riboswitches can be used to control the  
367 downstream expression of non-coding RNAs. In *L. monocytogenes*, a vitamin B<sub>12</sub>



368 riboswitch controls the expression of an antisense RNA that targets the mRNA of the  
369 PocR transcriptional regulator (54), while in both *Enterococcus faecalis* and *L.*  
370 *monocytogenes* a vitamin B<sub>12</sub> riboswitch also controls the transcription of trans-acting  
371 sRNAs EutX and Rli55, respectively (55,56). Full-length EutX and Rli55 possess  
372 structures that bind antiterminator proteins. When vitamin B<sub>12</sub> is present, transcriptional  
373 termination occurs preventing the synthesis of full-length EutX and Rli55. These  
374 truncated sRNAs are unable to sequester antiterminator proteins and thus transcriptional  
375 read-through of ethanolamine utilization (*eut*) genes (whose products require vitamin B<sub>12</sub>  
376 as a cofactor) is allowed. Our work adds to the unique and diverse repertoire of  
377 riboswitches and the multiple layers of control bacteria employ to regulate basic  
378 metabolic pathways as to our knowledge, this is only the second report of a riboswitch  
379 that plays a dual role in *trans* by inhibiting translation of a mRNA target (44).  
380 Interestingly, the other dual-acting riboswitch/sRNA is also a SAM-I riboswitch that is  
381 upstream of an ABC transporter operon in *Listeria monocytogenes*. In *trans*, the SreA  
382 sRNA decreases the level of the PrfA virulence regulator when SAM is present by  
383 negatively regulating the translation of the *prfA* mRNA (44).

384         It is likely that other regulators are involved in *Desulfovibrio* methionine  
385 biosynthesis and the relationship between DseA and *sahR* is much more intricate than  
386 was evaluated in this initial study. It will be necessary to investigate the regulation of the  
387 methionine biosynthesis genes *in vivo* before this pathway will be fully understood.  
388 Additionally, identification of the genes responsible for completing the methionine  
389 biosynthesis cycle and determining a role for DVU1170 will add insight into the  
390 regulation of this complex biosynthesis pathway.

391

## 392 **MATERIALS AND METHODS**

### 393 **Bacterial strains and growth conditions**

394 Bacterial strains and plasmids used in this study are listed in Table S1.

395 *Desulfovibrio vulgaris* Hildenborough (*DvH*) and strains constructed from *DvH* were  
396 grown statically at 34°C in an anoxic chamber (Coy) with an atmosphere composed of  
397 5% H<sub>2</sub>/95% N<sub>2</sub> in defined lactate/sulfate medium (LS4D) reduced with 5 ml per liter of  
398 an anaerobic titanium citrate solution (57). *E. coli* strains were grown at 37°C with  
399 shaking (200 rpm) in LB medium or M9 salts minimal media (58). When necessary,  
400 media was supplemented with the appropriate antibiotics at the following concentrations:  
401 ampicillin (50 µg/ml), kanamycin (50 µg/ml), geneticin (G418; 400 µg/ml), or  
402 spectinomycin (100 µg/ml).

### 403 **Nucleic Acid Isolation**

404 Genomic DNA (gDNA) was extracted from pure cultures grown overnight using  
405 the Wizard® Genomic DNA purification kit (Promega) following the manufacturer's  
406 protocol for Gram-negative bacteria.

407 RNA was extracted from *DvH* cultures grown to either exponential (OD<sub>600 nm</sub> 0.30  
408 – 0.50) or stationary growth phase (OD<sub>600 nm</sub> 0.80 – 0.90). Cultures were placed on ice  
409 and ice-cold stop solution (95% ethanol/5% phenol) was added at a final concentration of  
410 20% (v/v). Total RNA was isolated using TRI Reagent® Solution (Ambion) following the  
411 manufacturer's guidelines. The concentration and purity of the RNA was calculated by  
412 the ND-1000 NanoDrop Spectrophotometer (Thermo Scientific). RNA samples were  
413 treated with DNase using the TURBO DNA-free kit (Ambion) following the

414 manufacturer's protocol.

415 RNA transcripts were analyzed by Northern blot analysis. Each sample contained  
416 10 µg of DNase treated RNA mixed with an equal volume of Gel Loading Buffer II  
417 (Ambion). Samples were loaded onto a precast Novex<sup>®</sup> 6% or 10% TBE-urea gel and  
418 run in a X-cell Surelock<sup>™</sup> gel rig with 1X TBE. RiboRuler<sup>™</sup> Low Range RNA ladder  
419 (Thermo Scientific) was prepared and labeled according to manufacturer's guidelines  
420 using [gamma- <sup>32</sup>P]-ATP (6,000 Ci/mmol) (Perkin Elmer) and T4 Polynucleotide Kinase  
421 (PNK; NEB). The gel was separated from the cassette and equilibrated in 0.5X TBE  
422 buffer along with filter pads and a Nylon Charged Membrane (GE Healthcare).  
423 Electroblothing was carried out using a Trans-Blot<sup>®</sup> SD Semi-Dry Transfer Cell (Bio-  
424 Rad) for 2 h at a constant current of 200 mA. The membrane was rinsed and UV-  
425 crosslinked.

426 The membrane was hybridized overnight at 50°C with DNA oligo probes labeled  
427 with [gamma- <sup>32</sup>P]-ATP (6000 Ci/mmol) (Perkin Elmer). 20 pmol of the DNA oligo was  
428 mixed with 7 µl of [gamma- <sup>32</sup>P]-ATP, 2 µl of 10X PNK Reaction buffer, 1 µl of T4 PNK  
429 (NEB), and H<sub>2</sub>O up to 20 µl. Oligo mixtures were incubated at 37°C for 1 h. The probes  
430 were heated to 95°C for 5 min before being added. Membranes were washed twice with  
431 2X SSC/0.1% SDS for 5 min followed by two washes for 15 min with 0.1X SSC/0.1%  
432 SDS. The membranes were exposed to Fuji X-Ray film overnight at -80°C. The film was  
433 manually developed using Kodak developer and fixer solutions. Membranes were  
434 stripped with a 0.5% SDS solution while rotating for 1 h at 60°C. The membranes were  
435 rinsed with DEPC-H<sub>2</sub>O and hybridized as described above. The membranes were then  
436 probed with a DNA oligo targeting the 5S rRNA gene as a loading control. The probe

437 was labeled as described above. Probes used for Northern blots can be found in Table S2.

#### 438 **Rapid Amplification of cDNA Ends (RACE)**

439 The start and stop sites of transcription of DseA were determined by circular  
440 RACE as described elsewhere (59,60). Briefly, DNase-treated RNA was treated with  
441 Tobacco Acid Pyrophosphate (TAP) (Epicentre) at 37°C. The 5' monophosphate and 3'  
442 free –OH ends of the RNA were ligated with T4 RNA ligase (Invitrogen) to make  
443 circular molecules. The circular transcripts were reverse transcribed using a DseA  
444 specific primer (DseA CR R; Table S2) into first strand cDNA. PCR was used on the  
445 cDNA with primers on either side of the 5'/3' bridge region (DseA CR F and DseA CR R;  
446 Table S2). The PCR product was cloned into pJET1.2 (Thermo Scientific) and the  
447 plasmid was sequenced to determine the transcript ends.

#### 448 **RT-PCR and qRT-PCR**

449 Reverse transcriptase (RT)-PCR was carried out using ImProm-II reverse  
450 transcriptase (Promega) following the manufacturer's protocol with 1 µg of RNA. 5 µl of  
451 the cDNA reaction mixture was used as a template in a 50 µl PCR amplification reaction  
452 mixture with corresponding forward and reverse primers (Table S2) and GoTaq DNA  
453 polymerase (Promega), as described by the supplier. For control reactions, RNA without  
454 reverse transcriptase or chromosomal DNA was used as a template.

455 DNase-treated RNA extracted from various conditions was used for qRT-PCR  
456 analysis. The SuperScript® III First-strand Synthesis for qRT-PCR kit (Invitrogen) was  
457 used with 1 µg of DNase-treated RNA to make cDNA. 1 µl of the cDNA was used as  
458 template and reactions were carried out using the SYBR® Green SuperMix (Quanta  
459 Biosciences) and a MJ MiniOpticon™ thermocycler running CFX™ Manager software

460 (Bio-Rad). The cycling parameters consisted of an initial denaturation step of 3 min at  
461 95°C followed by 40 cycles of denaturation at 95°C for 30 s and annealing/extension at  
462 63°C for 30 s. After each cycle, fluorescence was recorded. A melt curve was performed  
463 at the end of each experiment starting at 63°C and concluding at 95°C (0.5°C/5 s). A no  
464 RT control indicated no DNA contamination was present. Transcript levels were  
465 normalized to the 16S rRNA gene or the *rplS* gene (DVU0835; primer sequences  
466 obtained from Christensen *et al.* (61)). and fold changes were calculated using the Pfaffl  
467 method (62). To calculate reaction efficiency of each gene-specific primer set, a standard  
468 curve using a series of diluted cDNA (6 logs of serially diluted 100 ng/μl cDNA) was  
469 generated.

#### 470 ***In vitro* transcription**

471 RNA was *in vitro* transcribed using the MEGAscript™ kit (Ambion)  
472 following the manufacturer's guidelines. Standard PCR was used to generate the DNA  
473 template from *DvH* gDNA. RNA was either purified by a phenol/chloroform extraction  
474 and ethanol precipitation or by the crush/soak method as described.

#### 475 **Crush/soak method of RNA purification**

476 *In vitro* transcribed RNA was run on a Novex® 6% polyacrylamide TBE-urea gel  
477 at 180 V for 30 – 45 min. The gel was removed from the plates, wrapped in plastic wrap,  
478 and placed on a TLC plate (Invitrogen). The RNA was visualized by UV shadowing with  
479 a hand-held UV lamp. The bands were excised, cut into small pieces, and two volumes of  
480 crush-soak solution were added (40) and the tubes were rotated end over end at 4°C  
481 overnight or for 2 h at room temperature. The tubes were centrifuged briefly, and the  
482 supernatant was transferred. The RNA was ethanol precipitated, washed, and

483 resuspended in DEPC-H<sub>2</sub>O. RNA was quantified using the ND-1000.

#### 484 **In-line probing assays**

485 In-line probing analysis was carried out as described previously (40). The tubes  
486 were centrifuged briefly, and the supernatant was transferred. The RNA was ethanol  
487 precipitated, washed, and resuspended DEPC-H<sub>2</sub>O. RNA was quantified using the ND-  
488 1000.

489 The RNA was dephosphorylated using Calf-Intestinal Alkaline Phosphatase  
490 (NEB) and gel purified as described above. The RNA was radiolabeled with T4 PNK as  
491 described previously but with 4 µl of [gamma- <sup>32</sup>P]-ATP (6000 Ci/mmol) (Perkin Elmer).  
492 The RNA was mixed with in-line buffer (40) and various amounts of metabolites as  
493 indicated. The reactions were incubated for 40 h at 25°C and then halted by the addition  
494 of 10 µl of 2X urea loading buffer. The T1 RNase ladder and alkaline hydrolysis ladder  
495 were prepared as previously described (40). The reactions were resolved by  
496 polyacrylamide gel electrophoresis using an 8% polyacrylamide/1X TBE-urea gel. The  
497 gel was dried using a gel dryer under vacuum pressure at 80°C for 90 min  
498 (FisherBiotech). The dried gel was exposed to a phosphor screen (Kodak) for 1 – 3 days  
499 and analyzed using the Typhoon™ FLA9500 Bimolecular Imager (GE Healthcare).  
500 Analysis was done using ImageQuant (GE Healthcare).

#### 501 **Single-round *in vitro* transcription termination assay**

502 Termination assays were carried out as previously described (63). The template  
503 DNA was PCR amplified from *DvH* gDNA using standard PCR parameters. The forward  
504 primer contained the T7A1 promoter that is recognized by the *E. coli* RNA polymerase  
505 (EpiBio) and a cytosine-less leader region (DseA T7A1 prom F/R; Table S2).

506 Transcription was carried out in various concentrations of SAM or methionine as  
507 indicated. Products were resolved by denaturing polyacrylamide electrophoresis and  
508 visualized using the Typhoon™ FLA9500 Bimolecular Imager (GE Healthcare).  
509 Analysis was done using ImageQuant (GE Healthcare). Percent termination was  
510 determined by the amount of termination product divided by the sum of total  
511 transcription products.

### 512 **Construction of *lacZ* fusions**

513 The predicted DseA promoter and riboswitch region were PCR amplified from  
514 *DvH* gDNA using a forward primer with an EcoRI cut site (DseA prom/EcoRI F; Table  
515 S2) added at the 5' end and a reverse primer with a BamHI cut site added at the 5' end  
516 (DseA prom/ BamHI R; Table S2). The PCR product was gel purified and digested with  
517 EcoRI and BamHI for 5 min at 37°C per manufacturer's guidelines. 1 µg of pRS415  
518 containing a promoterless *lacZ* gene was digested with BamHI and EcoRI per  
519 manufacturer's guidelines. The digested products were run on an agarose gel and purified  
520 as described above. The digested vector was mixed in a 1:1 molar ratio with the digested  
521 promoter and riboswitch product, 2 µl of 10X Buffer, 1 µl of T4 DNA ligase (Promega),  
522 and H<sub>2</sub>O up to 20 µl. Three additional reactions were carried out including a 3:1 molar  
523 ratio of vector to riboswitch, a vector only negative control, and an insert only negative  
524 control. Reactions were incubated overnight at room temperature. Tubes were placed at  
525 65°C to halt the reaction. The plasmids were transformed into *E. coli* TOP10 cells and  
526 plated on LB plates containing ampicillin (50 µg/µl). Successful ligation and cloning was  
527 verified by PCR screening and sequencing. The new vector was named pRS415-DseA.

### 528 **β-galactosidase assays**

529 Cells containing *lacZ* fusions were grown overnight in 5 ml of M9 minimal media  
530 with added leucine (30 mg/ml) and appropriate antibiotics. The next day, cultures were  
531 diluted 1:100 in fresh M9 minimal media in a 96-well plate and grown to an OD<sub>600 nm</sub> of  
532 0.100 – 0.200. 1 mM of methionine (Sigma) was added to half of the cultures while an  
533 equal volume of diH<sub>2</sub>O was added to control cultures. After 3 hours of incubation at 37°C  
534 with shaking (200 rpm) a final OD<sub>600 nm</sub> was taken using a microplate reader (BioTek  
535 Synergy HT). Samples were collected for β-galactosidase measurements and were  
536 assayed as described in (64).

### 537 **Electrophoretic Gel Shift Assay (EMSA).**

538 RNA was *in vitro* transcribed as described above. Primers were designed to  
539 amplify both the predicted sRNA DseA and a 5' portion of the SahR (DVU0606) mRNA  
540 (DseA T7 prom F/R and SahR T7 prom F/R, Table S2). The RNA was purified by  
541 polyacrylamide gel electrophoresis and the crush-soak method. The *sahR* RNA was  
542 radiolabeled with [gamma- <sup>32</sup>P]-ATP at the 5' end after dephosphorylation by CIP. 0.4  
543 pmol of DseA RNA or control RNA (Dv SIC2, generated using primers Dv sRNA-2 T7  
544 prom F/R) was mixed with 0.2 pmol of end-labeled SahR RNA in 5 μl of binding buffer  
545 (65). The mixture was incubated at 70°C for 5 min and then at 37°C for 20 min. Loading  
546 buffer II (Ambion) was added and the samples were loaded onto a Novex® 6% TBE gel.  
547 The gel was run at 200 V for 30 – 45 min. The gel was removed from the plates and  
548 vacuum dried on Whatman™ paper. The gel was exposed to Fuji film overnight at -80°C.  
549 The film was developed manually by brief immersion in Kodak developer and fixer.

### 550 **Construction of a DseA deletion and complement strain**



551 The deletion strain,  $\Delta dseA$ , was constructed by the J. Wall Laboratory (University  
552 of Missouri) as described in Bender et al. (66,67). A region upstream of DseA, the  
553 neomycin phosphotransferase (*npt*) gene that confers resistance to kanamycin and G418,  
554 and a region downstream of DseA were PCR amplified and then fused together via  
555 overhangs into one product similar to previously described protocols. This product was  
556 ligated into an *E. coli* cloning vector, which is not stable in *DvH*, and transformed into *E.*  
557 *coli* TOP10 cells. This vector was then electroporated into *DvH* as described previously  
558 (67). Transformants were screened and sequenced to verify the deletion of DseA by  
559 homologous recombination and the new strain was designated  $\Delta dseA$ .

560 To complement the  $\Delta dseA$  strain, the region corresponding to the DseA +1 site  
561 through the terminator region (*DvH* coordinates 1,264,319 – 1,264,156) was amplified  
562 with primers DseA-pSIL300-BamHI-F/DseA-pSIL300R. This allowed for directional  
563 cloning into the pSIL300 vector, which is a derivative of pMO719 (68) that possesses the  
564 promoter for the *DvH* cytochrome *c*<sub>3</sub> gene (DVU3171) with BamHI and ScaI sites  
565 (GAGTCCCAAACCGCCATGAATCTAGGCTTCCCGCTCCATTCCTTGACACTCT  
566 ATCATTGATAGAGTTACCATCCCGCTCCCTATCAGTGATAGAGAGGGGGATC  
567 CATATAGTACTAATA). This cytochrome *c*<sub>3</sub> promoter was inserted into the EcoRV  
568 site of the parent vector using primers Xba-c3pro-F and  
569 c3proBamSca-R. The resulting plasmid, *pdseA*, was transformed into the  $\Delta dseA$  strain as  
570 described above and the complement strain was selected by plating on LS4D containing  
571 both G418 and spectinomycin.

572

573

574 **Acknowledgements**

575 We thank Dr. Judy Wall and Tom Juba (University of Missouri) for construction  
576 of the deletion strain. We thank Dr. Derek Fisher (Southern Illinois University  
577 Carbondale) for assistance with the  $\beta$ -galactosidase assays and helpful discussions.

578

579 **Funding**

580 This material by ENIGMA- Ecosystems and Networks Integrated with Genes and  
581 Molecular Assemblies (<http://engima.lbl.gov>), a Scientific Focus Area Program at  
582 Lawrence Berkeley National Laboratory, is based upon work supported by the U. S.  
583 Department of Energy, Office of Science, Office of Biological & Environmental  
584 Research under contract number DE-AC02-05CH11231.

585

586 **References**

- 587 1. Bastet, L., Dube, A., Masse, E. and Lafontaine, D.A. (2011) New insights into  
588 riboswitch regulation mechanisms. *Mol Microbiol*, **80**, 1148-1154.
- 589 2. Bobrovskyy, M., Vanderpool, C.K. and Richards, G.R. (2015) Small RNAs  
590 Regulate Primary and Secondary Metabolism in Gram-negative Bacteria.  
591 *Microbiol Spectr*, **3**.
- 592 3. Gottesman, S. and Storz, G. (2011) Bacterial small RNA regulators: versatile  
593 roles and rapidly evolving variations. *Cold Spring Harb Perspect Biol*, **3**.
- 594 4. Hoe, C.H., Raabe, C.A., Rozhdestvensky, T.S. and Tang, T.H. (2013) Bacterial  
595 sRNAs: regulation in stress. *Int J Med Microbiol*, **303**, 217-229.

- 596 5. Mellin, J.R. and Cossart, P. (2015) Unexpected versatility in bacterial  
597 riboswitches. *Trends Genet*, **31**, 150-156.
- 598 6. Michaux, C., Verneuil, N., Hartke, A. and Giard, J.C. (2014) Physiological roles  
599 of small RNA molecules. *Microbiology*, **160**, 1007-1019.
- 600 7. Oliva, G., Sahr, T. and Buchrieser, C. (2015) Small RNAs, 5' UTR elements and  
601 RNA-binding proteins in intracellular bacteria: impact on metabolism and  
602 virulence. *FEMS Microbiol Rev*, **39**, 331-349.
- 603 8. Wagner, E.G. and Romby, P. (2015) Small RNAs in bacteria and archaea: who  
604 they are, what they do, and how they do it. *Adv Genet*, **90**, 133-208.
- 605 9. Raghavan, R., Groisman, E.A. and Ochman, H. (2011) Genome-wide detection of  
606 novel regulatory RNAs in *E. coli*. *Genome Res*, **21**, 1487-1497.
- 607 10. Shinhara, A., Matsui, M., Hiraoka, K., Nomura, W., Hirano, R., Nakahigashi, K.,  
608 Tomita, M., Mori, H. and Kanai, A. (2011) Deep sequencing reveals as-yet-  
609 undiscovered small RNAs in *Escherichia coli*. *BMC Genomics*, **12**, 428.
- 610 11. del Val, C., Rivas, E., Torres-Quesada, O., Toro, N. and Jimenez-Zurdo, J.I.  
611 (2007) Identification of differentially expressed small non-coding RNAs in the  
612 legume endosymbiont *Sinorhizobium meliloti* by comparative genomics. *Mol*  
613 *Microbiol*, **66**, 1080-1091.
- 614 12. Madhugiri, R., Pessi, G., Voss, B., Hahn, J., Sharma, C.M., Reinhardt, R., Vogel,  
615 J., Hess, W.R., Fischer, H.M. and Evguenieva-Hackenberg, E. (2012) Small  
616 RNAs of the Bradyrhizobium/Rhodopseudomonas lineage and their analysis.  
617 *RNA Biol*, **9**, 47-58.

- 618 13. Mellin, J.R. and Cossart, P. (2012) The non-coding RNA world of the bacterial  
619 pathogen *Listeria monocytogenes*. *RNA Biol*, **9**, 372-378.
- 620 14. Postic, G., Frapy, E., Dupuis, M., Dubail, I., Livny, J., Charbit, A. and Meibom,  
621 K.L. (2010) Identification of small RNAs in *Francisella tularensis*. *BMC*  
622 *Genomics*, **11**, 625.
- 623 15. Schiano, C.A. and Lathem, W.W. (2012) Post-transcriptional regulation of gene  
624 expression in *Yersinia* species. *Front Cell Infect Microbiol*, **2**, 129.
- 625 16. Schluter, J.P., Reinkensmeier, J., Daschkey, S., Evguenieva-Hackenberg, E.,  
626 Janssen, S., Janicke, S., Becker, J.D., Giegerich, R. and Becker, A. (2010) A  
627 genome-wide survey of sRNAs in the symbiotic nitrogen-fixing alpha-  
628 proteobacterium *Sinorhizobium meliloti*. *BMC Genomics*, **11**, 245.
- 629 17. Adnan, F., Weber, L. and Klug, G. (2015) The sRNA SorY confers resistance  
630 during photooxidative stress by affecting a metabolite transporter in *Rhodobacter*  
631 *sphaeroides*. *RNA Biol*, **12**, 569-577.
- 632 18. Amin, S.V., Roberts, J.T., Patterson, D.G., Coley, A.B., Allred, J.A., Denner,  
633 J.M., Johnson, J.P., Mullen, G.E., O'Neal, T.K., Smith, J.T. *et al.* (2016) Novel  
634 small RNA (sRNA) landscape of the starvation-stress response transcriptome of  
635 *Salmonella enterica* serovar typhimurium. *RNA Biol*, **13**, 331-342.
- 636 19. Delihias, N. and Forst, S. (2001) MicF: an antisense RNA gene involved in  
637 response of *Escherichia coli* to global stress factors. *J Mol Biol*, **313**, 1-12.
- 638 20. Masse, E., Vanderpool, C.K. and Gottesman, S. (2005) Effect of RyhB small  
639 RNA on global iron use in *Escherichia coli*. *J Bacteriol*, **187**, 6962-6971.

- 640 21. Wadler, C.S. and Vanderpool, C.K. (2007) A dual function for a bacterial small  
641 RNA: SgrS performs base pairing-dependent regulation and encodes a functional  
642 polypeptide. *Proc Natl Acad Sci U S A*, **104**, 20454-20459.
- 643 22. Zhang, A., Altuvia, S., Tiwari, A., Argaman, L., Hengge-Aronis, R. and Storz, G.  
644 (1998) The OxyS regulatory RNA represses *rpoS* translation and binds the Hfq  
645 (HF-I) protein. *EMBO J*, **17**, 6061-6068.
- 646 23. Majdalani, N., Cunning, C., Sledjeski, D., Elliott, T. and Gottesman, S. (1998)  
647 DsrA RNA regulates translation of RpoS message by an anti-antisense  
648 mechanism, independent of its action as an antisilencer of transcription. *Proc Natl*  
649 *Acad Sci U S A*, **95**, 12462-12467.
- 650 24. Opdyke, J.A., Kang, J.G. and Storz, G. (2004) GadY, a small-RNA regulator of  
651 acid response genes in *Escherichia coli*. *J Bacteriol*, **186**, 6698-6705.
- 652 25. Updegrave, T., Wilf, N., Sun, X. and Wartell, R.M. (2008) Effect of Hfq on  
653 RprA-rpoS mRNA pairing: Hfq-RNA binding and the influence of the 5' rpoS  
654 mRNA leader region. *Biochemistry*, **47**, 11184-11195.
- 655 26. Wassarman, K.M. and Storz, G. (2000) 6S RNA regulates *E. coli* RNA  
656 polymerase activity. *Cell*, **101**, 613-623.
- 657 27. Breaker, R.R. (2012) Riboswitches and the RNA world. *Cold Spring Harb*  
658 *Perspect Biol*, **4**.
- 659 28. Winkler, W.C. and Breaker, R.R. (2005) Regulation of bacterial gene expression  
660 by riboswitches. *Annu Rev Microbiol*, **59**, 487-517.

- 661 29. Fuchs, R.T., Grundy, F.J. and Henkin, T.M. (2006) The S(MK) box is a new  
662 SAM-binding RNA for translational regulation of SAM synthetase. *Nat Struct*  
663 *Mol Biol*, **13**, 226-233.
- 664 30. Wang, J.X. and Breaker, R.R. (2008) Riboswitches that sense S-  
665 adenosylmethionine and S-adenosylhomocysteine. *Biochem Cell Biol*, **86**, 157-  
666 168.
- 667 31. Rodionov, D.A., Vitreschak, A.G., Mironov, A.A. and Gelfand, M.S. (2004)  
668 Comparative genomics of the methionine metabolism in Gram-positive bacteria: a  
669 variety of regulatory systems. *Nucleic Acids Res*, **32**, 3340-3353.
- 670 32. Weissbach, H. and Brot, N. (1991) Regulation of methionine synthesis in  
671 *Escherichia coli*. *Mol Microbiol*, **5**, 1593-1597.
- 672 33. Rodionov, D.A., Dubchak, I., Arkin, A., Alm, E. and Gelfand, M.S. (2004)  
673 Reconstruction of regulatory and metabolic pathways in metal-reducing delta-  
674 proteobacteria. *Genome Biol*, **5**, R90.
- 675 34. Novichkov, P.S., Li, X., Kuehl, J.V., Deutschbauer, A.M., Arkin, A.P., Price,  
676 M.N. and Rodionov, D.A. (2014) Control of methionine metabolism by the SahR  
677 transcriptional regulator in Proteobacteria. *Environ Microbiol*, **16**, 1-8.
- 678 35. Price, M.N., Deutschbauer, A.M., Kuehl, J.V., Liu, H., Witkowska, H.E. and  
679 Arkin, A.P. (2011) Evidence-based annotation of transcripts and proteins in the  
680 sulfate-reducing bacterium *Desulfovibrio vulgaris* Hildenborough. *J Bacteriol*,  
681 **193**, 5716-5727.
- 682 36. Dehal, P.S., Joachimiak, M.P., Price, M.N., Bates, J.T., Baumohl, J.K., Chivian,  
683 D., Friedland, G.D., Huang, K.H., Keller, K., Novichkov, P.S. *et al.* (2010)

- 684           MicrobesOnline: an integrated portal for comparative and functional genomics.  
685           *Nucleic Acids Res*, **38**, D396-400.
- 686   37.   Griffiths-Jones, S., Bateman, A., Marshall, M., Khanna, A. and Eddy, S.R. (2003)  
687           Rfam: an RNA family database. *Nucleic Acids Res*, **31**, 439-441.
- 688   38.   Tomsic, J., McDaniel, B.A., Grundy, F.J. and Henkin, T.M. (2008) Natural  
689           variability in S-adenosylmethionine (SAM)-dependent riboswitches: S-box  
690           elements in *Bacillus subtilis* exhibit differential sensitivity to SAM *in vivo* and *in*  
691           *vitro*. *J Bacteriol*, **190**, 823-833.
- 692   39.   Winkler, W.C., Nahvi, A., Sudarsan, N., Barrick, J.E. and Breaker, R.R. (2003)  
693           An mRNA structure that controls gene expression by binding S-  
694           adenosylmethionine. *Nat Struct Biol*, **10**, 701-707.
- 695   40.   Wakeman, C.A. and Winkler, W.C. (2009) Analysis of the RNA backbone:  
696           structural analysis of riboswitches by in-line probing and selective 2'-hydroxyl  
697           acylation and primer extension. *Methods Mol Biol*, **540**, 173-191.
- 698   41.   Darty, K., Denise, A. and Ponty, Y. (2009) VARNA: Interactive drawing and  
699           editing of the RNA secondary structure. *Bioinformatics*, **25**, 1974-1975.
- 700   42.   Grundy, F.J. and Henkin, T.M. (1998) The S box regulon: a new global  
701           transcription termination control system for methionine and cysteine biosynthesis  
702           genes in gram-positive bacteria. *Mol Microbiol*, **30**, 737-749.
- 703   43.   Mironov, A.S., Gusarov, I., Rafikov, R., Lopez, L.E., Shatalin, K., Kreneva, R.A.,  
704           Perumov, D.A. and Nudler, E. (2002) Sensing small molecules by nascent RNA:  
705           a mechanism to control transcription in bacteria. *Cell*, **111**, 747-756.

- 706 44. Loh, E., Dussurget, O., Gripenland, J., Vaitkevicius, K., Tiensuu, T., Mandin, P.,  
707 Repoila, F., Buchrieser, C., Cossart, P. and Johansson, J. (2009) A trans-acting  
708 riboswitch controls expression of the virulence regulator PrfA in *Listeria*  
709 *monocytogenes*. *Cell*, **139**, 770-779.
- 710 45. Busch, A., Richter, A.S. and Backofen, R. (2008) IntaRNA: efficient prediction of  
711 bacterial sRNA targets incorporating target site accessibility and seed regions.  
712 *Bioinformatics*, **24**, 2849-2856.
- 713 46. Caron, M.P., Lafontaine, D.A. and Masse, E. (2010) Small RNA-mediated  
714 regulation at the level of transcript stability. *Rna Biology*, **7**, 140-144.
- 715 47. Storz, G., Vogel, J. and Wassarman, K.M. (2011) Regulation by small RNAs in  
716 bacteria: expanding frontiers. *Mol Cell*, **43**, 880-891.
- 717 48. Vogel, J. and Wagner, E.G. (2007) Target identification of small noncoding  
718 RNAs in bacteria. *Curr Opin Microbiol*, **10**, 262-270.
- 719 49. Mandin, P. and Gottesman, S. (2009) A genetic approach for finding small RNAs  
720 regulators of genes of interest identifies RybC as regulating the DpiA/DpiB two-  
721 component system. *Mol Microbiol*, **72**, 551-565.
- 722 50. Azam, M.S. and Vanderpool, C.K. (2018) Translational regulation by bacterial  
723 small RNAs via an unusual Hfq-dependent mechanism. *Nucleic Acids Res*, **46**,  
724 2585-2599.
- 725 51. Kuehl, J.V., Price, M.N., Ray, J., Wetmore, K.M., Esquivel, Z., Kazakov, A.E.,  
726 Nguyen, M., Kuehn, R., Davis, R.W., Hazen, T.C. *et al.* (2014) Functional  
727 genomics with a comprehensive library of transposon mutants for the sulfate-  
728 reducing bacterium *Desulfovibrio alaskensis* G20. *MBio*, **5**, e01041-01014.



- 729 52. Price, M.N., Zane, G.M., Kuehl, J.V., Melnyk, R.A., Wall, J.D., Deutschbauer,  
730 A.M. and Arkin, A.P. (2018) Filling gaps in bacterial amino acid biosynthesis  
731 pathways with high-throughput genetics. *PLoS Genet*, **14**, e1007147.
- 732 53. De Lay, N.R. and Garsin, D.A. (2016) The unmasking of 'junk' RNA reveals  
733 novel sRNAs: from processed RNA fragments to marooned riboswitches. *Curr*  
734 *Opin Microbiol*, **30**, 16-21.
- 735 54. Mellin, J.R., Tiensuu, T., Becavin, C., Gouin, E., Johansson, J. and Cossart, P.  
736 (2013) A riboswitch-regulated antisense RNA in *Listeria monocytogenes*. *Proc*  
737 *Natl Acad Sci U S A*, **110**, 13132-13137.
- 738 55. DebRoy, S., Gebbie, M., Ramesh, A., Goodson, J.R., Cruz, M.R., van Hoof, A.,  
739 Winkler, W.C. and Garsin, D.A. (2014) Riboswitches. A riboswitch-containing  
740 sRNA controls gene expression by sequestration of a response regulator. *Science*,  
741 **345**, 937-940.
- 742 56. Mellin, J.R., Koutero, M., Dar, D., Nahori, M.A., Sorek, R. and Cossart, P. (2014)  
743 Riboswitches. Sequestration of a two-component response regulator by a  
744 riboswitch-regulated noncoding RNA. *Science*, **345**, 940-943.
- 745 57. Mukhopadhyay, A., He, Z., Alm, E.J., Arkin, A.P., Baidoo, E.E., Borglin, S.C.,  
746 Chen, W., Hazen, T.C., He, Q., Holman, H.Y. *et al.* (2006) Salt stress in  
747 *Desulfovibrio vulgaris* Hildenborough: an integrated genomics approach. *J*  
748 *Bacteriol*, **188**, 4068-4078.
- 749 58. Davis, L.G., Dibner, M.D. and Battey, J.F. (1986) Basic methods in molecular  
750 biology.

- 751 59. Abdelrahman, Y.M., Rose, L.A. and Belland, R.J. (2011) Developmental  
752 expression of non-coding RNAs in *Chlamydia trachomatis* during normal and  
753 persistent growth. *Nucleic Acids Res*, **39**, 1843-1854.
- 754 60. Vogel, J. and Hess, W.R. (2001) Complete 5' and 3' end maturation of group II  
755 intron-containing tRNA precursors. *RNA*, **7**, 285-292.
- 756 61. Christensen, G.A., Zane, G.M., Kazakov, A.E., Li, X., Rodionov, D.A.,  
757 Novichkov, P.S., Dubchak, I., Arkin, A.P. and Wall, J.D. (2015) Rex (encoded by  
758 DVU\_0916) in *Desulfovibrio vulgaris* Hildenborough is a repressor of sulfate  
759 adenylyl transferase and is regulated by NADH. *J Bacteriol*, **197**, 29-39.
- 760 62. Pfaffl, M.W. (2001) A new mathematical model for relative quantification in real-  
761 time RT-PCR. *Nucleic Acids Res*, **29**, e45.
- 762 63. Artsimovitch, I. and Henkin, T.M. (2009) In vitro approaches to analysis of  
763 transcription termination. *Methods*, **47**, 37-43.
- 764 64. Battesti, A. and Bouveret, E. (2012) The bacterial two-hybrid system based on  
765 adenylate cyclase reconstitution in *Escherichia coli*. *Methods*, **58**, 325-334.
- 766 65. Morita, T., Maki, K. and Aiba, H. (2012) Detection of sRNA-mRNA interactions  
767 by electrophoretic mobility shift assay. *Methods Mol Biol*, **905**, 235-244.
- 768 66. Bender, K.S., Yen, H.C., Hemme, C.L., Yang, Z., He, Z., He, Q., Zhou, J.,  
769 Huang, K.H., Alm, E.J., Hazen, T.C. *et al.* (2007) Analysis of a ferric uptake  
770 regulator (Fur) mutant of *Desulfovibrio vulgaris* Hildenborough. *Appl Environ*  
771 *Microbiol*, **73**, 5389-5400.

- 772 67. Bender, K.S., Yen, H.C. and Wall, J.D. (2006) Analysing the metabolic  
773 capabilities of *Desulfovibrio* species through genetic manipulation. *Biotechnol*  
774 *Genet Eng Rev*, **23**, 157-174.
- 775 68. Keller, K.L., Bender, K.S. and Wall, J.D. (2009) Development of a markerless  
776 genetic exchange system for *Desulfovibrio vulgaris* Hildenborough and its use in  
777 generating a strain with increased transformation efficiency. *Appl Environ*  
778 *Microbiol*, **75**, 7682-7691.

779

780

## 781 **Figure Legends**

782

783 **Figure 1.** Expression of DseA and chromosomal location. (A) Northern Blot analysis  
784 showing 10 µg of *DvH* RNA from both exponential (Exp.) and stationary (Stat.) growth  
785 phases. The blot was hybridized with the DseA 30mer probe (Table S2) and size was  
786 determined by comparison to RiboRuler™ Low Range RNA ladder. The membrane was  
787 stripped and re-probed for the 5S rRNA. (B) The DNA sequence of DseA determined by  
788 circular RACE. The predicted  $\sigma^{70}$  promoter is underlined. The +1 site of transcription is  
789 indicated with a black arrow. The inverted repeats of the predicted intrinsic terminator are  
790 indicated with grey arrows. (C) Genome view of the region around DseA encompassing  
791 coordinates 1,266,111 – 1,263,449. Gene size and location are not to scale.

792

793 **Figure 2.** Relative quantification of DVU1170 during growth with or without added  
794 methionine. Transcript levels were normalized to the 16S rRNA transcript (using primers  
795 DVU1170 qRT-PCR F/R and 16S qRT-PCR F2/R2; Table S2). Expression of the 0 min

796 control was artificially set to 1 and expression data for the remaining time-points were  
797 determined by the CFX<sup>TM</sup> Manager software. Error bars represent standard error. Samples  
798 with added methionine were compared to the same time-point without methionine using  
799 Student t test, two tailed (\* p< 0.05, \*\* p< 0.01).

800

801 **Figure 3.** Structural analysis of the DseA riboswitch. (A) Spontaneous cleavage pattern  
802 of DseA in the absence or presence of SAM, methionine (Met), or SAH as indicated. The  
803 location of some of the guanosine residues (G) cleaved by RNase T1 is indicated. NR: no  
804 reaction; T1: RNase T1 ladder; -OH: alkaline hydrolysis ladder. (B) Lane profiles as  
805 determined by the program ImageQuant (GE Healthcare) of in-line probing gel. The  
806 numbers match to the same numbered areas of the gel. The lane profile of the T1 ladder is  
807 plotted in the bottom panel and represents the G residues as labeled. (C) Predicted  
808 secondary structure of DseA. When SAM concentrations are high an intrinsic terminator  
809 (T) is predicted to form. When SAM concentrations drop the anti-terminator (AT) forms  
810 instead. Bases colored blue are involved in forming the antiterminator.

811

812 **Figure 4.** DseA riboswitch expression platform response. (A) *In vitro* transcription  
813 termination assay of the riboswitch region. Percent termination was determined by the  
814 amount of termination product divided by the sum of total transcription products. (B)  $\beta$ -  
815 galactosidase activity of pRS415-DseA and the negative control vector pRS415. Values  
816 represent the mean of three experiments. Activity is represented by Miller Units. Error  
817 bars represent standard deviation.

818

819 **Figure 5.** Interaction of DseA with *sahR* RNA. (A) Predicted interaction region of DseA  
820 (green) and *sahR* (blue) as determined by IntaRNA (55). The RBS is underlined while the  
821 start codon is bolded. (B) EMSA showing radiolabeled *sahR* alone, mixed with Dv  
822 sRNA2, and DseA. The migration of free *sahR* and bound *sahR* is indicated. The  
823 following primers were used to generate *in vitro* transcripts: SahR T7 prom F/R, Dv  
824 sRNA-2 T7 prom F/R, and DseA T7 prom F/R (Table S2).

825

826 **Figure 6.** (A) qRT-PCR analysis of *sahR* expression in both exponential (Exp.) and  
827 stationary (Stat.) growth. (B) qRT-PCR analysis of additional predicted targets of DseA  
828 during exponential growth. Transcript levels were determined for wild-type DvH,  $\Delta dseA$ ,  
829 and the complement ( $\Delta dseA + pdseA$ ). Each gene was normalized to the 16S rRNA and  
830 *rplS* reference genes. The efficiency of each primer pair is as follows: *sahR*- 90.1%,  
831 DVU0277-88.9%, DVU1165- 90.0%, DVU1362-89.7%, DVU1411-89.5%, DVU1977-  
832 85.2%, DVU2373-90.2%, DVU2514-91.3%, DVU2938-94.9%, DVU3156-89.8%, 16S  
833 rRNA gene-92.5%, *rplS*-97.0%. Error bars represent standard error. Samples from  $\Delta dseA$   
834 and  $\Delta dseA + pdseA$  were compared to the wild-type sample from the same growth phase  
835 using Student t test, two tailed (\*  $p < 0.05$ , \*\*  $p < 0.01$ ).

836

837 **Figure 7.** Predicted model for the activity of DseA under high SAM concentrations  
838 versus low SAM concentrations. DseA is represented in purple, the anti-terminator is  
839 orange, and the sequence shared by the terminator and anti-terminator is blue. *sahR*  
840 mRNA is shown in green. T: terminator; AT: antiterminator.

841

842 **Figure S1.** Alignment of RACE clone sequences corresponding to DseA. Positions 1-25  
843 correspond to the 3'-end and position 26 corresponds to the +1 site of the RNA as  
844 depicted in Figure 1B.

845

846 **Figure S2.** Alignment of conserved DseA sequences. Abbreviations are as follows: DvH,  
847 *Desulfovibrio vulgaris* Hildenborough; Dv RCH1, *Desulfovibrio vulgaris* RCH1; Dv  
848 DP4, *Desulfovibrio vulgaris* DP4; DvM, *Desulfovibrio vulgaris* Miyazaki F; Ds 2638,  
849 *Desulfovibrio salexigens* DSM2638; Da G20, *Desulfovibrio alaskensis* G20. Black  
850 shading indicates identically conserved bases while grey shading represents similarly  
851 conserved bases.

852

853 **Figure S3.** Alignment of the predicted riboswitch region of two *Desulfovibrio* species  
854 and other known SAM riboswitches. Alignment was generated by Rfam (48) and the  
855 colors represent the consensus base for that location.

856

857 **Figure S4.** RT-PCR analysis of DVU1170 region. **(A)** Co-transcription of DseA and  
858 DVU1170. Top of panel illustrates the genomic view of the DseA-DVU1170 locus with  
859 lines a, b, c, and d indicating regions of the locus targeted by RT-PCR. Primers 1170 RT  
860 F1-F4/R (Table S2) were used to target regions a-d. **(B)** DVU1170 and DVU1169 are not  
861 co-transcribed. Top of panel illustrates the genomic view of the DVU1170-DVU1169  
862 locus with lines a, b, and c indicating regions of the locus targeted by RT-PCR. Primers  
863 DVU1169 RT F1-3/R were used to target regions a-c. Gel analysis of the RT-PCR results  
864 are provided in the bottom of each panel. The reactions within each set of four wells

865 corresponding to the mapped genome regions are as follows: (-), PCR without DNA  
866 template as a negative control; (-RT), PCR with RNA as the template as a negative  
867 control; (+), PCR with genomic DNA from *DvH* as a control; and (+RT), RT-PCR with  
868 RNA as a template.

869 **Figure S5.** DseA-*sahR* mRNA interaction region. (A) The sequence encompassing the -  
870 36 to +126 (in reference to the start codon) region of the *sahR* mRNA. The RBS is  
871 underlined, and the start codon is bolded. The predicted region of interaction between  
872 DseA and *sahR* is shown in red. (B) EMSA showing interaction between DseA and RNA  
873 oligos of portions of the *sahR* mRNA. The sequence of oligo 1, oligo 2, and oligo 3 is  
874 underlined with a black, blue, and purple line, respectively. The aforementioned oligos  
875 were generated using the following primer sets in Table S2: SahR T7 prom F/SahR Rev 2  
876 (oligo 1), SahR T7 prom F/SahR Rev 3 (oligo 2), and SahR Middle F/SahR Rev 3  
877 (oligo3).

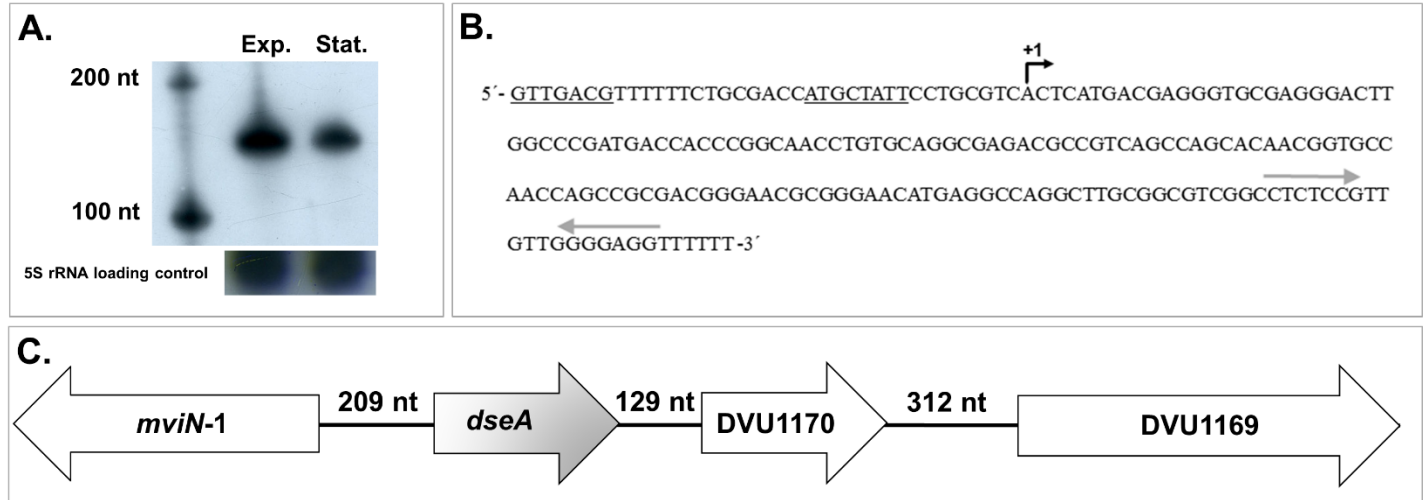

**Figure 1.** Expression of DseA and chromosomal location. (A) Northern Blot analysis showing 10  $\mu$ g of *DvH* RNA from both exponential (Exp.) and stationary (Stat.) growth phases. The blot was hybridized with the DseA 30mer probe (Table S2) and size was determined by comparison to RiboRuler<sup>TM</sup> Low Range RNA ladder. The membrane was stripped and re-probed for the 5S rRNA. (B) The DNA sequence of DseA determined by circular RACE. The predicted promoter is underlined. The +1 site of transcription is indicated with a black arrow. The inverted repeats of the predicted intrinsic terminator are indicated with grey arrows. (C) Genome view of the region around DseA encompassing coordinates 1,266,111 – 1,263,449. Gene size and location are not to scale.



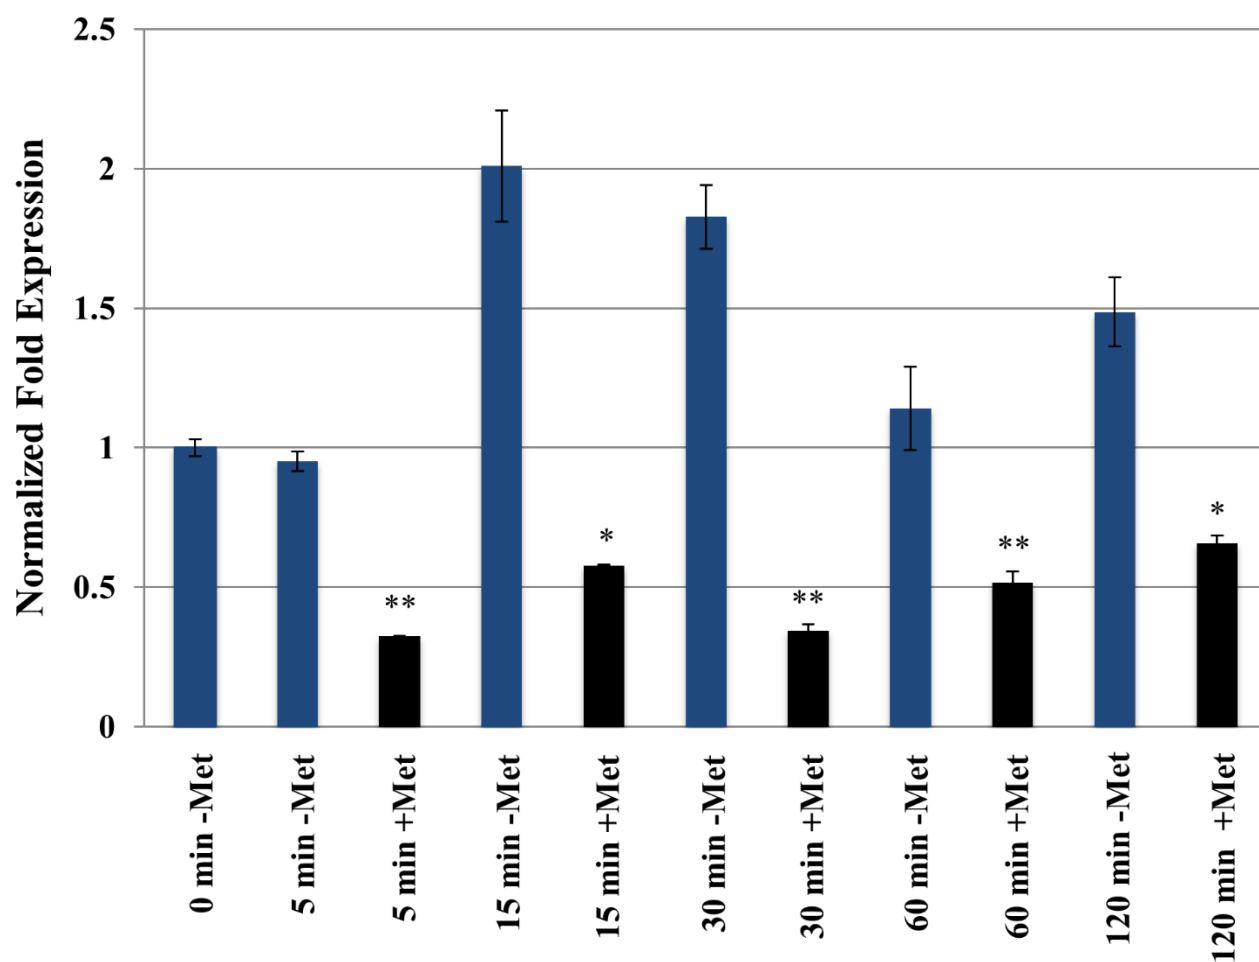

**Figure 2.** Relative quantification of DVU1170 during growth with or without added methionine. Transcript levels were normalized to the 16S rRNA transcript (using primers DVU1170 qRT-PCR F/R and 16S qRT-PCR F2/R2; Table S2). Expression of the 0 min control was artificially set to 1 and expression data for the remaining time-points were determined by the CFX<sup>TM</sup> Manager software. Error bars represent standard error. Samples with added methionine were compared to the same time-point without methionine using Student t test, two tailed (\*  $p < 0.05$ , \*\*  $p < 0.01$ ).

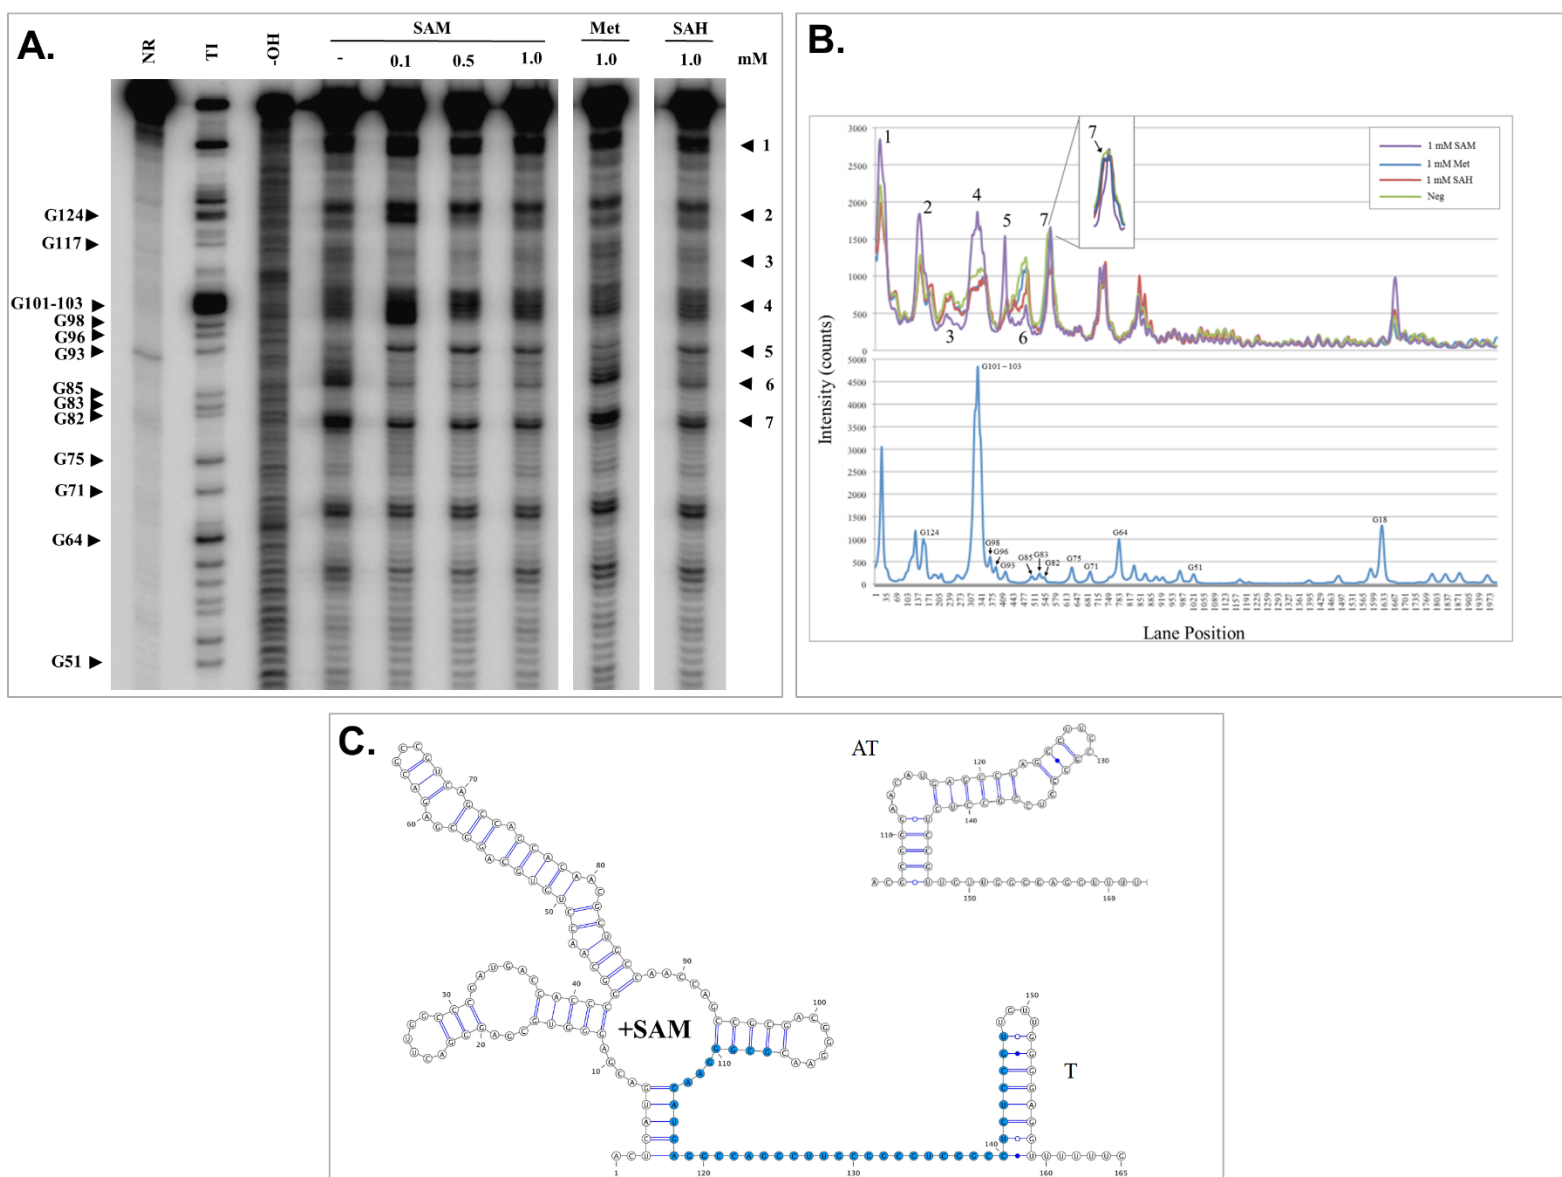

**Figure 3.** Structural analysis of the DseA riboswitch. **(A)** Spontaneous cleavage pattern of DseA in the absence or presence of SAM, methionine (Met), or SAH as indicated. The location of some of the guanosine residues (G) cleaved by RNase T1 is indicated. NR: no reaction; T1: RNase T1 ladder; -OH: alkaline hydrolysis ladder. **(B)** Lane profiles as determined by the program ImageQuant (GE Healthcare) of in-line probing gel. The numbers match to the same numbered areas of the gel. The lane profile of the T1 ladder is plotted in the bottom panel and represents the G residues as labeled. **(C)** Predicted secondary structure of DseA. When SAM concentrations are high an intrinsic terminator (T) is predicted to form. When SAM concentrations drop the anti-terminator (AT) forms instead. Bases colored blue are involved in forming the antiterminator.

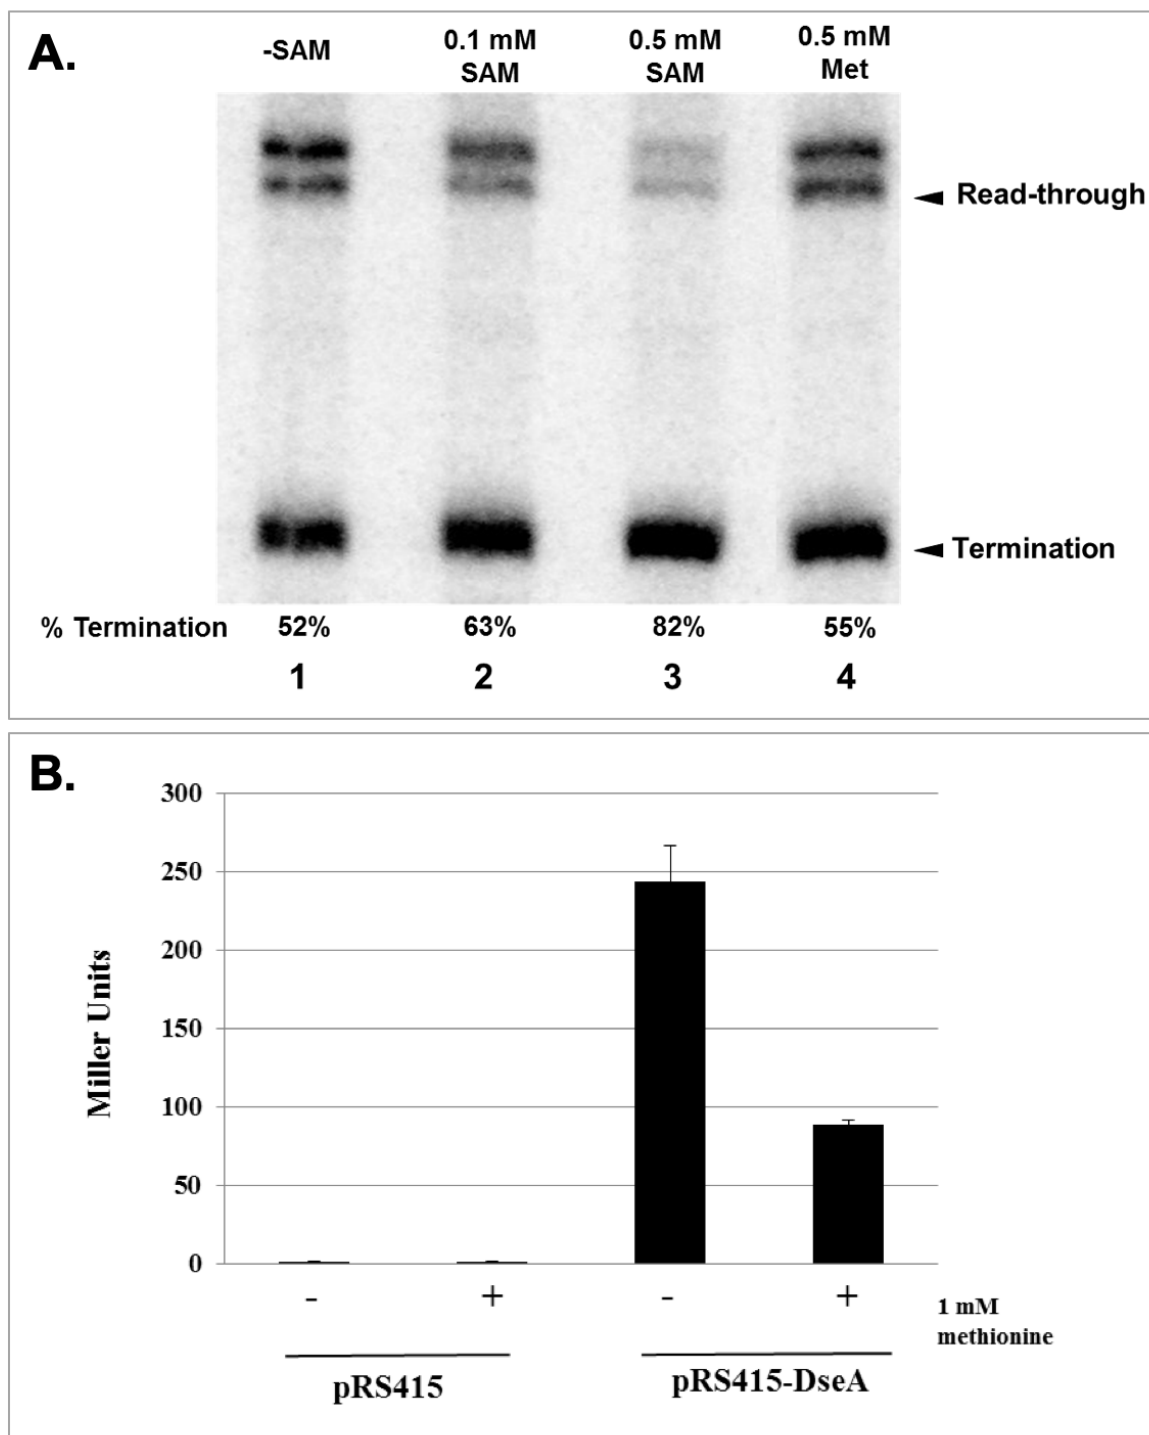

**Figure 4.** DseA riboswitch expression platform response. (A) *In vitro* transcription termination assay of the riboswitch region. Percent termination was determined by the amount of termination product divided by the sum of total transcription products. (B)  $\beta$ -galactosidase activity of pRS415-DseA and the negative control vector pRS415. Values represent the mean of three experiments. Activity is represented by Miller Units. Error bars represent standard deviation.

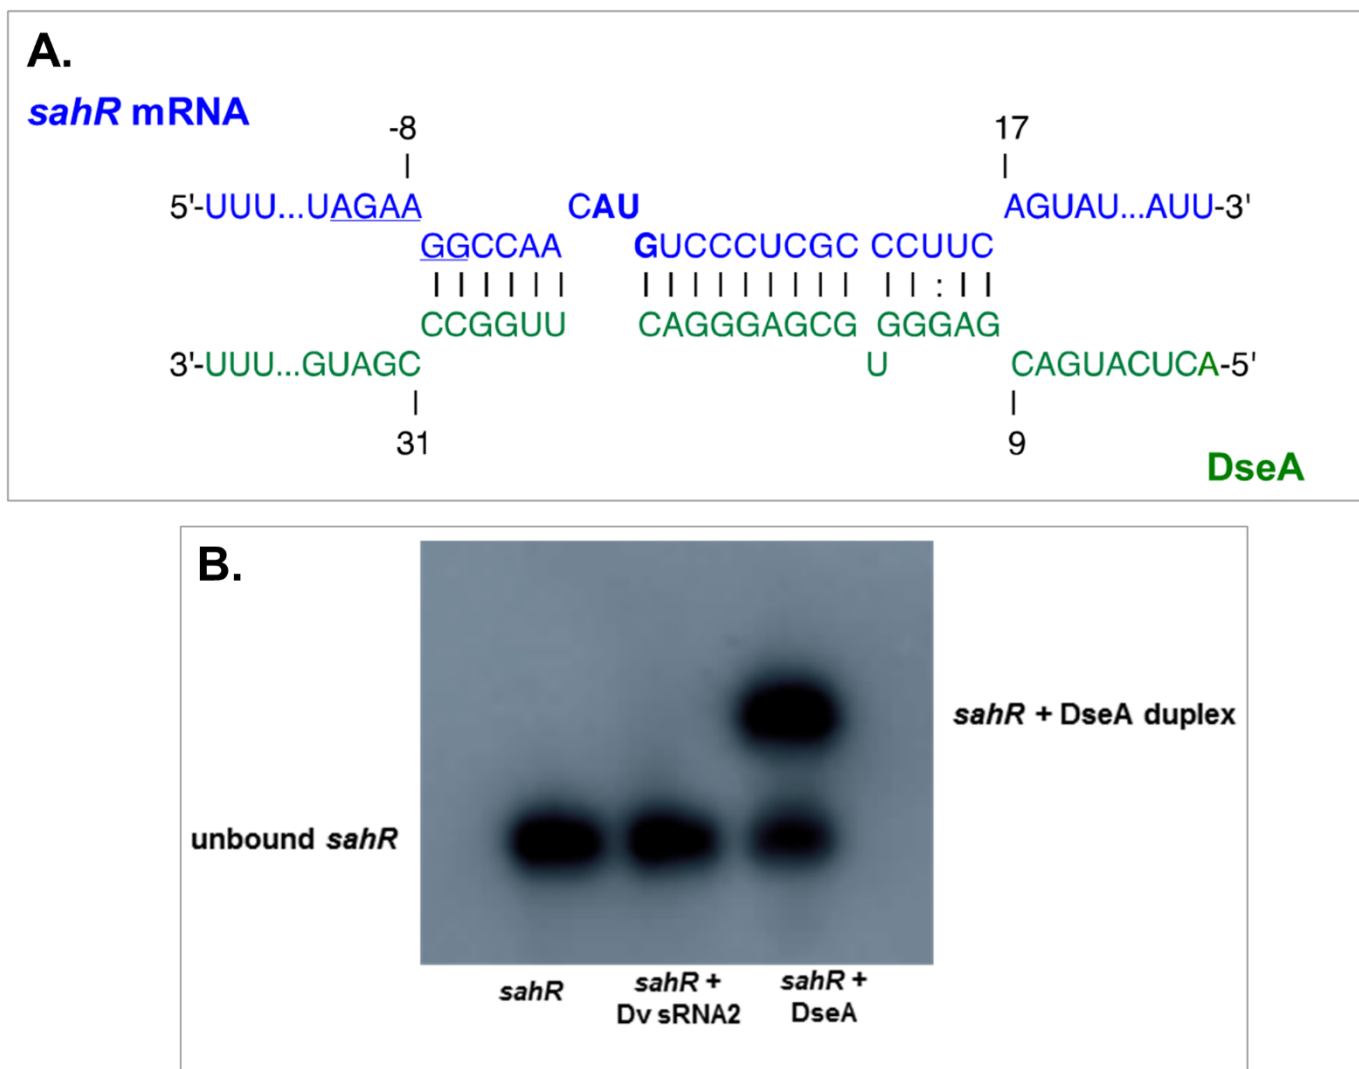

**Figure 5.** Interaction of DseA with *sahR* RNA. (A) Predicted interaction region of DseA (green) and *sahR* (blue) as determined by IntaRNA (55). The RBS is underlined while the start codon is bolded. (B) EMSA showing radiolabeled *sahR* alone, mixed with Dv sRNA2, and DseA. The migration of free *sahR* and bound *sahR* is indicated. The following primers were used to generate *in vitro* transcripts: SahR T7 prom F/R, Dv sRNA-2 T7 prom F/R, and DseA T7 prom F/R (Table S2).

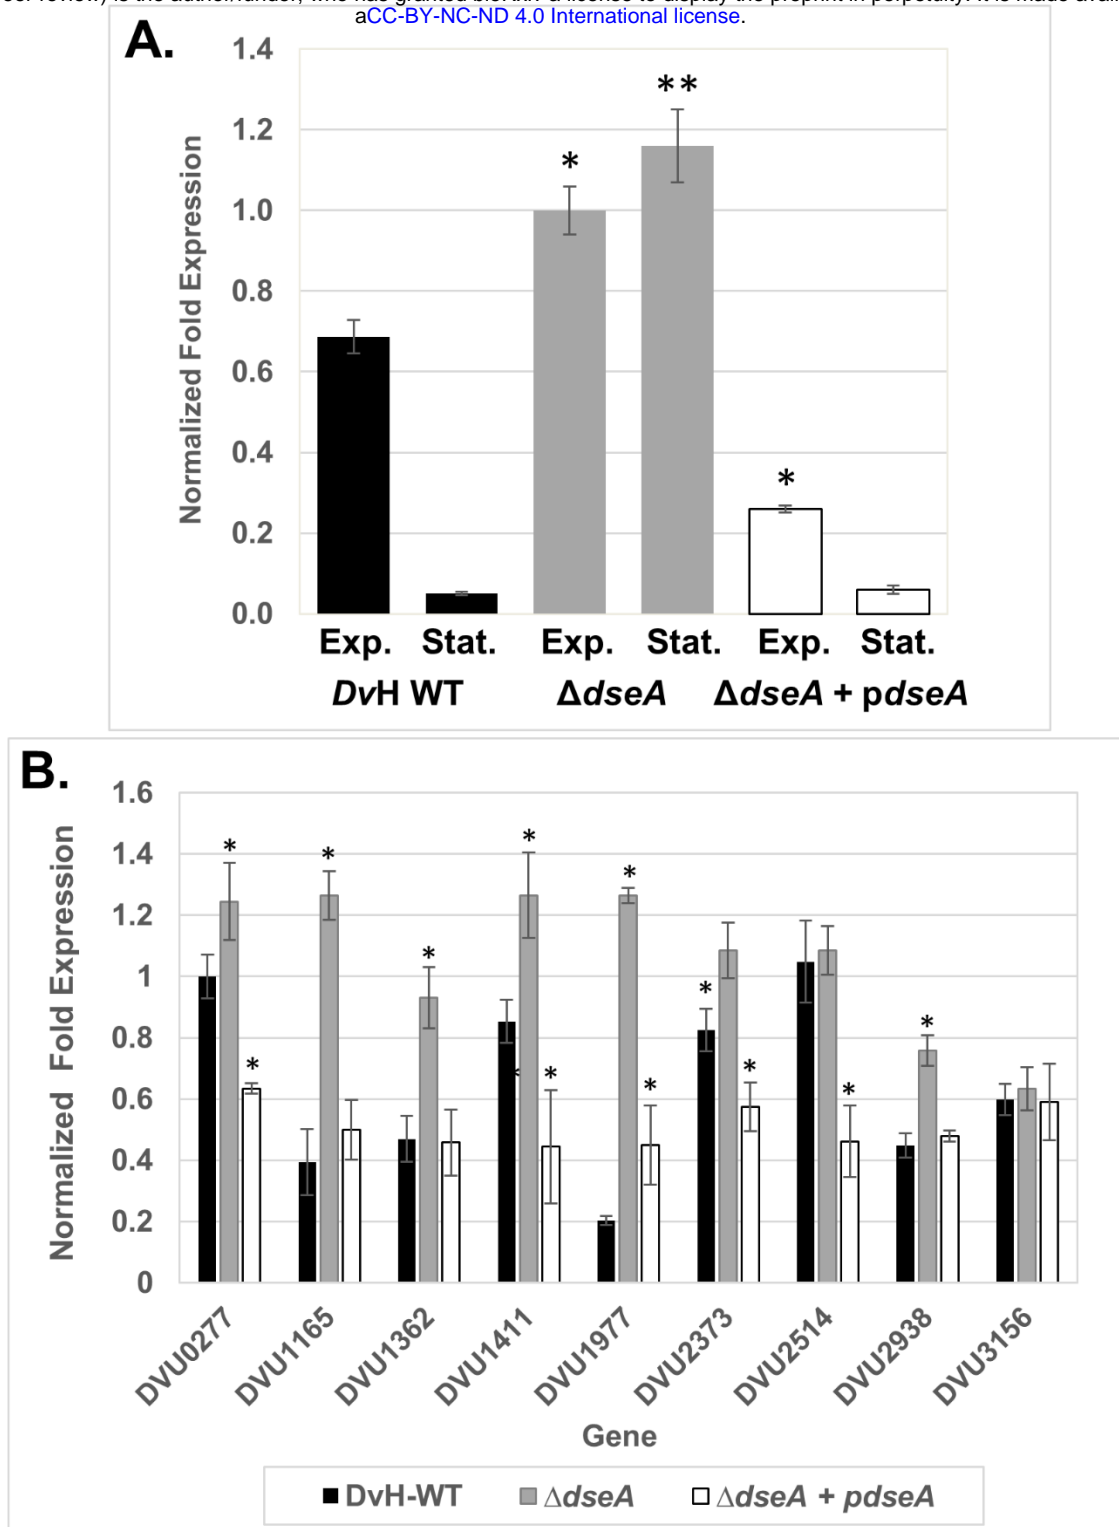

**Figure 6. (A)** qRT-PCR analysis of *sahR* expression in both exponential (Exp.) and stationary (Stat.) growth. **(B)** qRT-PCR analysis of additional predicted targets of DseA during exponential growth. Transcript levels were determined for wild-type DvH,  $\Delta dseA$ , and the complement ( $\Delta dseA + pdseA$ ). Each gene was normalized to the 16S rRNA and *rplS* reference genes. The efficiency of each primer pair is as follows: *sahR*- 90.1%, DVU0277-88.9%, DVU1165- 90.0%, DVU1362-89.7%, DVU1411-89.5%, DVU1977-85.2%, DVU2373-90.2%, DVU2514-91.3%, DVU2938-94.9%, DVU3156-89.8%, 16S rRNA gene-92.5%, *rplS*-97.0%. Error bars represent standard error. Samples from  $\Delta dseA$  and  $\Delta dseA + pdseA$  were compared to the wild-type sample from the same growth phase using Student t test, two tailed (\*  $p < 0.05$ , \*\*  $p < 0.01$ ).

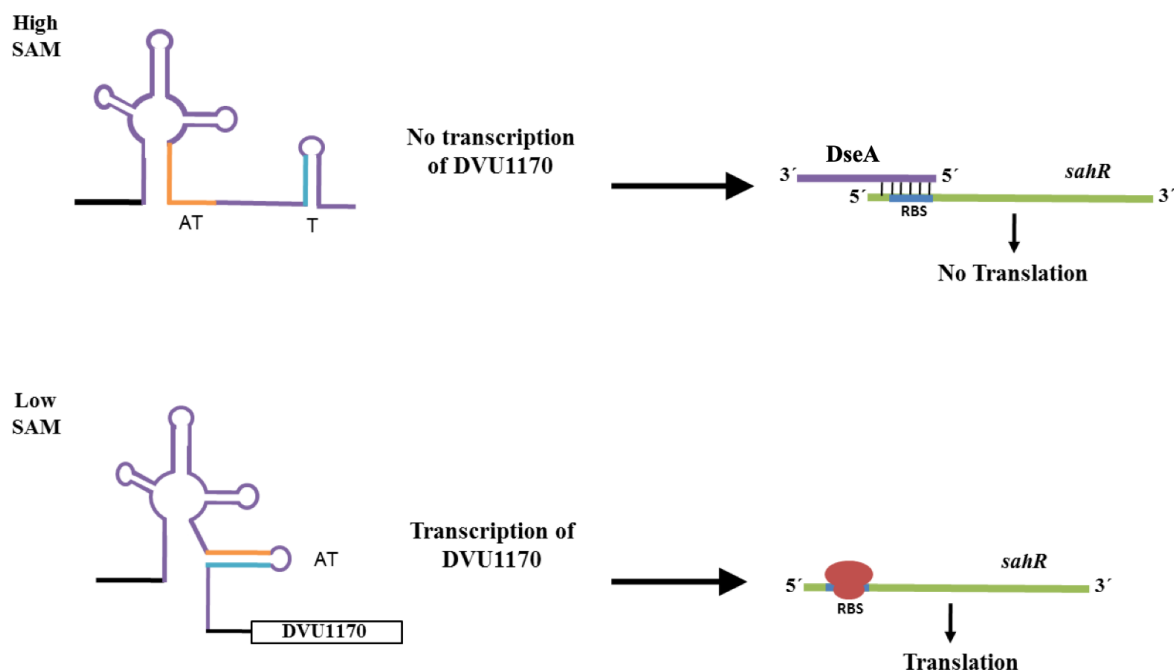

**Figure 7.** Predicted model for the activity of DseA under high SAM concentrations versus low SAM concentrations. DseA is represented in purple, the anti-terminator is orange, and the sequence shared by the terminator and anti-terminator is blue. *sahR* mRNA is shown in green. T: terminator; AT: antiterminator.
