# Supplementary material for: A dual functioning small RNA/Riboswitch controls the expression of the methionine biosynthesis regulator SahR in Desulfovibrio vulgaris Hildenborough
Source: bioRxiv or medRxiv preprint supplement (doi:10.1101/803072), 2019-10-13
Supplement: Supplementary file [file media-1.pdf]

## SUPPLEMENTAL MATERIAL

### A dual functioning small RNA/Riboswitch controls the expression of the methionine biosynthesis regulator SahR in *Desulfovibrio vulgaris* Hildenborough

M. L. Kempfer<sup>1,3</sup>, A. S. Burns<sup>1,3</sup>, P. S. Novichkov<sup>2,3</sup>, and K. S. Bender<sup>1,3\*</sup>

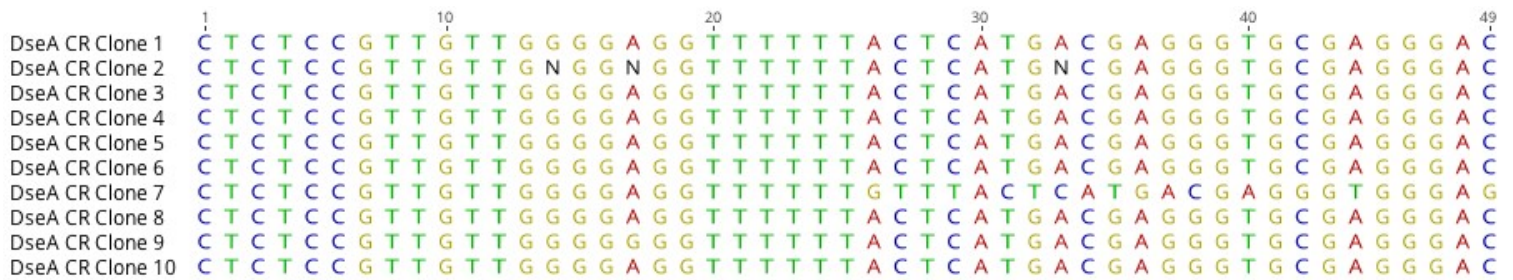

**Figure S1.** Alignment of RACE clone sequences corresponding to DseA. Positions 1-25 correspond to the 3'-end and position 26 corresponds to the +1 site of the RNA as depicted in Figure 1B.

```

DvH      1  ACTCATGACGAG-GGTGCGAGGGA-CTTGGCCCGATGACCACCCGGCAACCTGTGCAGGC
Dv RCH1  1  ACTCATGACGAG-GGTGCGAGGGA-CTTGGCCCGATGACCACCCGGCAACCTGTGCAGGC
Dv DP4   1  ACTCATGACGAG-GGTGCGAGGGA-CTTGGCCCGATGACCACCCGGCAACCTGTGCAGGC
DvM      1  ATTTCATGGAGAGAGGCGCGAGGG-TACGGCCCTGTGACC GCCCGGCAACCTGCCCTGAC
Ds 2638  1  ACTCATGTAGAG-GATGCGAGGGAAATCGGCCCGTCGACCATCCGGCAACCTGCT-----
Da G20   1  ACTCATGAAGAG-GACGAGAGGGG-TCTGGCCCGATGACCCTCCGGCAACCTGCCCG---

DvH      59  GAGACGCCGTCAGCCAGCACAACGGTGCCAA--CCAGCCGCGACGGGAA--CGCGGGGAAC
Dv RCH1  59  GAGACGCCGTCAGCCAGCACAACGGTGCCAA--CCAGCCGCGACGGGAA--CGCGGGGAAC
Dv DP4   59  GAGACGCCGTCAGCCAGCACAACGGTGCCAA--CCAGCCGCGACGGGAA--CGCGGGGAAC
DvM      59  GTGACGCCGTCGGTCCGGGACAA--GGTGCCAAATACCGACCGTGT--AGCG--CACGGGATC
Ds 2638  55  -----TCAG-CAG--CAA--GGTGCCAAATGCCCTCC--CGT-----TACGGGACC
Da G20   56  -----CAAGGCAA--GGTGCCAAAGCCAGCCACGGTGAGATGCGCGGGTGCC

DvH      115 -ATGAGGCCAG-GCTTGCGGC-----GTCGG-CCTCTC-----CGTT----GTTGGGG
Dv RCH1  115 -ATGAGGCCAG-GCTTGCGGC-----GTCGG-CCTCTC-----CGTT----GTTGGGG
Dv DP4   115 -ATGAGGCCAG-GCTTGCGGC-----GTCGG-CCTCTC-----CGTT----GTTGGGG
DvM      114 -ATGATCGCGG-GCTTGCGGC-----GTCGG-CCTCTC-----C--TT----GC--GAG
Ds 2638  93  CATGAGA--GG-GACTAAAAC-----ATTGAATTCTTAAAGGCATTTCGGATTGGAG
Da G20   101 -ATGAGGTCGACAGCTGCGACC GGTTACC GTTCTGCCTCTCAC--CATT----GT--GAG

DvH      156  AGGTTTTTTT--
Dv RCH1  156  AGGTTTTTTT--
Dv DP4   156  AGGTTTTTTT--
DvM      152  GGGCTTTTTT--
Ds 2638  143  ATGCCTTTTTTT
Da G20   151  AGGTTTTTTT-

```

**Figure S2.** Alignment of conserved DseA sequences. Abbreviations are as follows: DvH, *Desulfovibrio vulgaris* Hildenborough; Dv RCH1, *Desulfovibrio vulgaris* RCH1; Dv DP4, *Desulfovibrio vulgaris* DP4; DvM, *Desulfovibrio vulgaris* Miyazaki F; Ds 2638, *Desulfovibrio salexigens* DSM2638; Da G20, *Desulfovibrio alaskensis* G20. Black shading indicates identically conserved bases while grey shading represents similarly conserved bases.

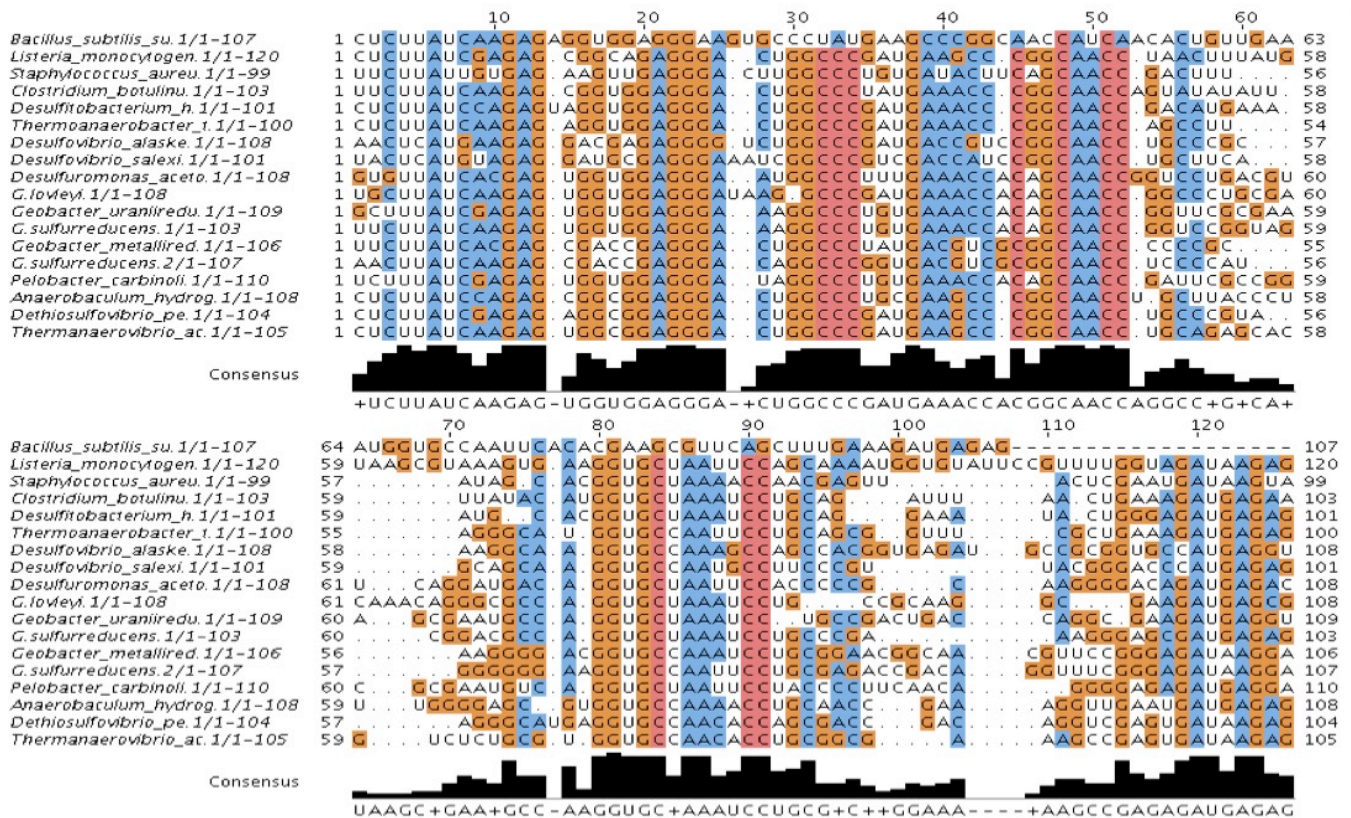

**Figure S3.** Alignment of the predicted riboswitch region of two *Desulfovibrio* species and other known SAM riboswitches. The colors represent the consensus base for that location.

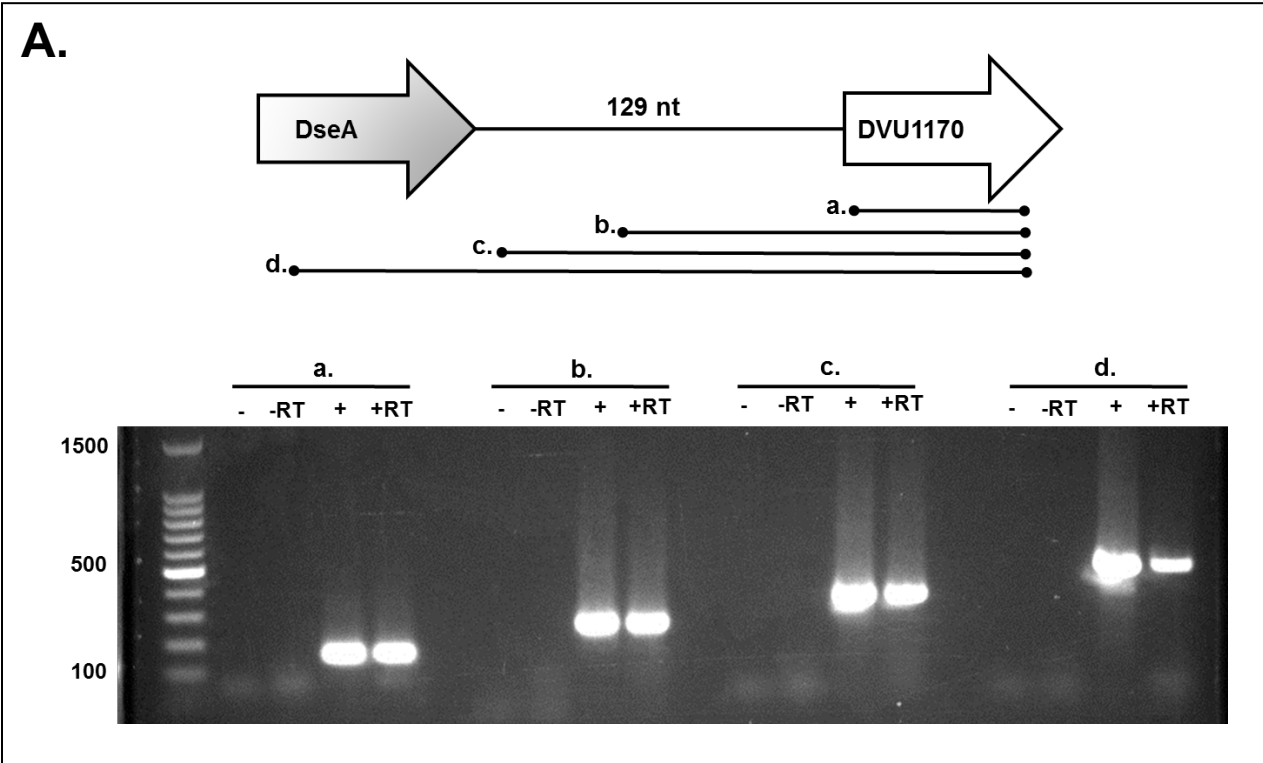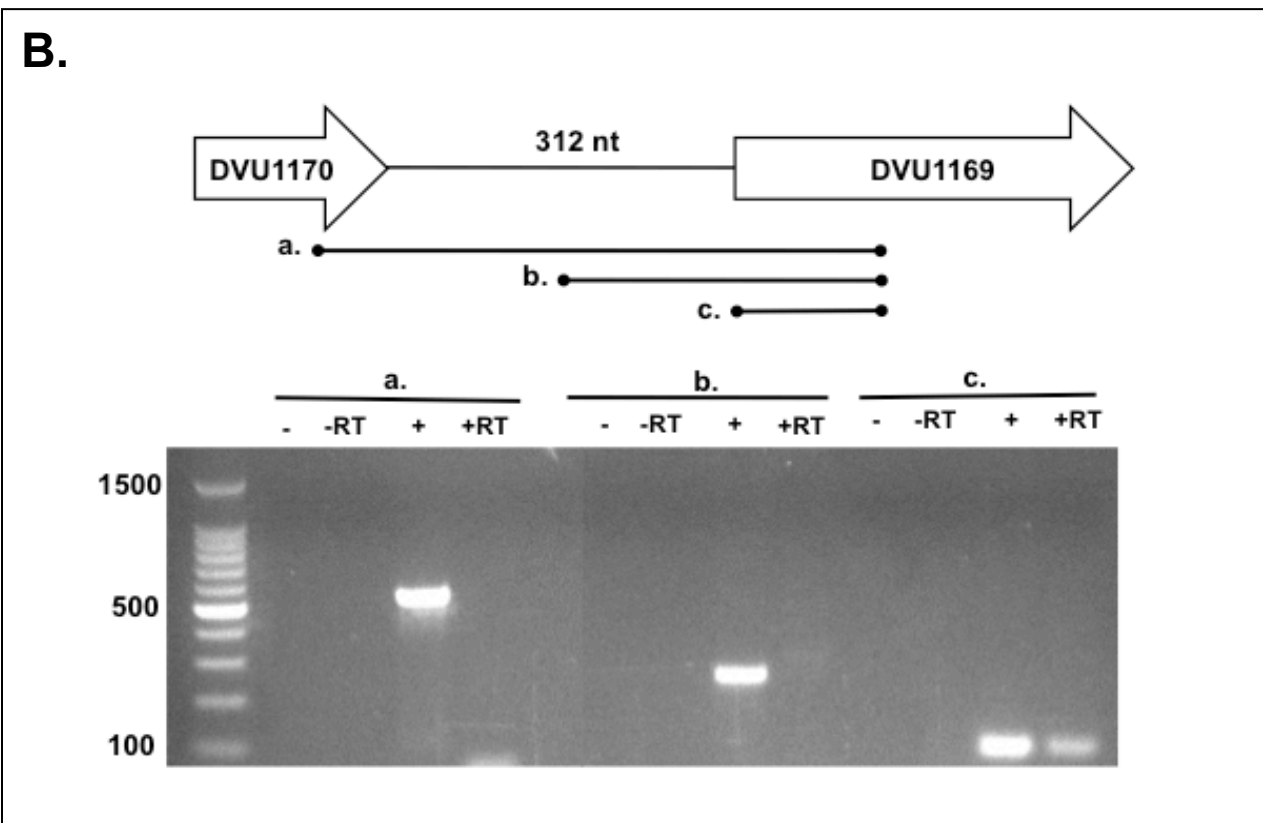

**Figure S4.** RT-PCR of DVU1169 transcript. **(A)** Genomic view of the DVU1170 and DVU1169 region. Lines a, b, and c indicate regions of the locus amplified by PCR as shown in panel B. **(B)** RT-PCR results. Lanes 1–4 corresponds to line a, lanes 5–8 to line b, lanes 9–12 to line c. Within each set of 4 wells, PCR to amplify lines a–c was performed with RNA after RT (+RT), RNA without RT as a control (-RT), PCR without DNA template as a control (-), and PCR with genomic DNA from *DvH* as a positive control (+).

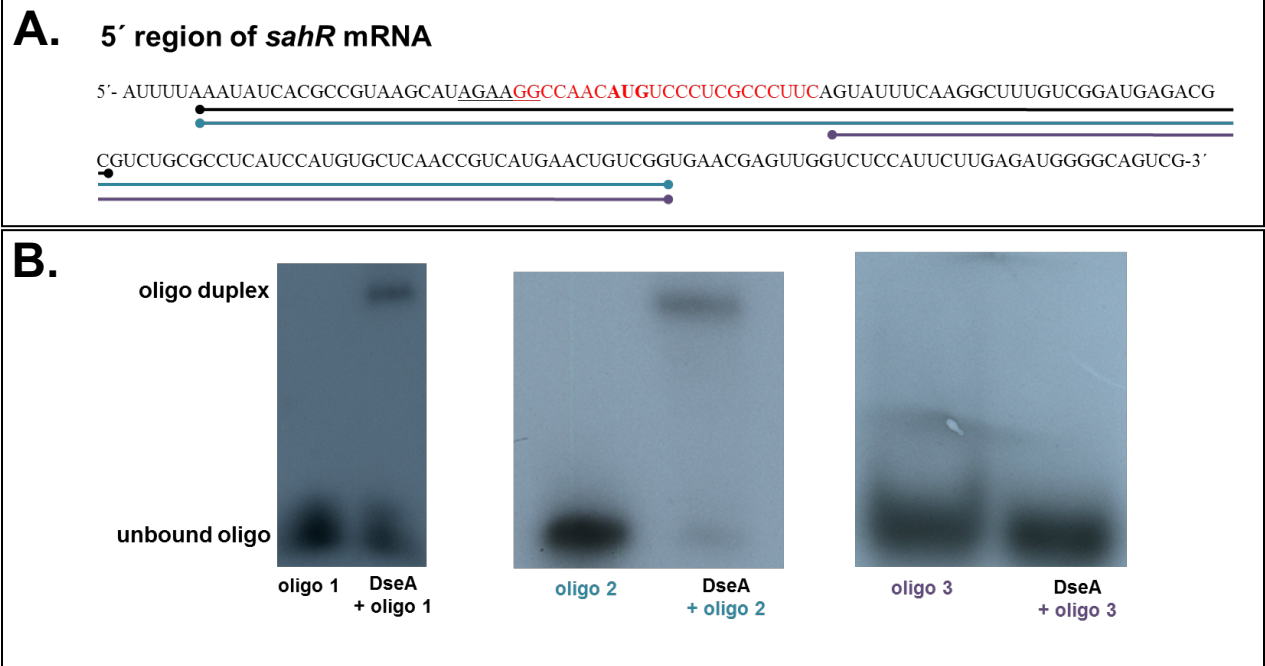

**Figure S5. (A)** The sequence encompassing the -36 to +126 (in reference to the start codon) region of the *sahR* mRNA. The RBS is underlined and the start codon is bolded. The predicted region of interaction between DseA and *sahR* is shown in red. **(B)** EMSA showing interaction between DseA and RNA oligos of portions of the *sahR* mRNA. The sequence of oligo 1, oligo 2, and oligo 3 is underlined with a black, blue, and purple line, respectively.

**TABLE S1.** Bacterial strains and plasmids used in this study.

| <b>Strains</b>                                 | <b>Genotype/Description</b>                                                                                                                                                                         | <b>Source/Reference</b>                |
|------------------------------------------------|-----------------------------------------------------------------------------------------------------------------------------------------------------------------------------------------------------|----------------------------------------|
| <i>Desulfovibrio vulgaris</i><br>Hildenborough | Wild-type strain Hildenborough                                                                                                                                                                      | ATCC 29579 <sup>T</sup>                |
| $\Delta dseA$                                  | <i>DvH</i> , $\Delta dseA$ , Km <sup>R</sup> , G418 <sup>R</sup>                                                                                                                                    | Judy Wall Lab (University of Missouri) |
| <i>E. coli</i> TOP10                           | F- <i>mcrA</i> $\Delta$ ( <i>mrr-hsdRMS-mcrBC</i> )<br>$\Phi 80lacZ\Delta M15$<br>$\Delta lacX74 recA1 araD139$<br>$\Delta$ ( <i>araleu</i> )7697 <i>galU galK rpsL</i><br>(StrR) <i>endA1 nupG</i> | Invitrogen                             |
| <b>Plasmids</b>                                |                                                                                                                                                                                                     |                                        |
| pRS415                                         | <i>E. coli</i> expression vector, promoterless<br><i>lacZ</i> , Amp <sup>R</sup>                                                                                                                    | Simons et al., 1983                    |
| pRS415-DseA                                    | pRS415 with the promoter region of<br>DseA, Amp <sup>R</sup>                                                                                                                                        | This study                             |
| <i>pdseA</i>                                   | pSIL300 with DseA, Spec <sup>R</sup>                                                                                                                                                                | This study                             |

**TABLE S2.** Primers and probes used in this study.

| Name                | Sequence (5' – 3')                                                             |
|---------------------|--------------------------------------------------------------------------------|
| DseA 30mer Probe    | GCAAGCCTGGCCTCATGTTCCCGCGTTCGTCGC                                              |
| DvH 5S 40mer Probe  | TTTCCCACGAGCTACCCCGCAGTATCATCGGCGATGGAGGGC                                     |
| DseA CR F           | AACATGAGGCCAGGCTTGCGG                                                          |
| DseA CR R           | GTTCCCGTCGCGGCTGGTTG                                                           |
| 1170 RT F1          | ATGACCACCCGGCAACCTGTGCAG                                                       |
| 1170 RT F2          | CACATGTCGTGGCTGCAGGTGGGT                                                       |
| 1170 RT F3          | GCCACGCGCATAGGGGAACACGATG                                                      |
| 1170 RT F4          | ATGCCCGTCCAATGGACCGATCCC                                                       |
| 1170 RT R           | TGTTCTTGCGGAAGGCTCGGCCATT                                                      |
| DVU1169 RT F1       | AAGGAGCGGAGACGGTCTGGAATGG                                                      |
| DVU1169 RT F2       | TCTGCACCGCATCAACGCGACTCC                                                       |
| DVU1169 RT F3       | TTCTCCGTCATCTGCGTCCTGTCTCTCG                                                   |
| DVU1169 RT R        | GCCTCGCCGAACGATTCGTTGTAGTCC                                                    |
| DseA prom/EcoRI F   | GAATTCGTTGACGTTTTTTCTGCGACC                                                    |
| DseA prom/ BamHI R  | GGATCCACGACATGTGTCTGTGCTG                                                      |
| 16S qRT-PCR F2      | GTGCGAAAGCGTGGGGAGCA                                                           |
| 16S qRT-PCR R2      | ACGGCACCGAAGCTCAAGGC                                                           |
| DVU1170 qRT-PCR F   | AGATGCGACGCAGATGGACGAATTGC                                                     |
| DVU1170 qRT-PCR R   | ATGATGTTCTTGCGGAAGGCTCGGC                                                      |
| sahR qRT-PCR F      | GCCGATTTGCGCCAGCATCAACATGG                                                     |
| sahR qRT-PCR R      | CGAAATCCGTGACCATGAGTTGGCCT                                                     |
| DseA T7 prom F      | TAATACGACTCACTATAGGGACTCATGACGAGGGTGCAGGGAC                                    |
| DseA T7 prom R      | CAAAAAACCTCCCAACAACGGAGAGGCC                                                   |
| DseA R              | GGCATGGGCGCTTCCTCGTTGTGGTA                                                     |
| DseA T7A1 prom F    | TTGACTTAAAGTCTAACCTATAGGATACTATGTAGTAAGGAGGTTGTAT<br>GGAAGAACTCATGACGAGGGTGCGA |
| DseA T7A1 R         | CGTGCAACGGCCTGAAATCCACCCACCT                                                   |
| SahR T7 prom F      | TAATACGACTCACTATAGGGTAAATATCACGCCGTAAGCATAGAA                                  |
| SahR T7 prom R      | GCAAACCGGCACCCGTGAGAATCTT                                                      |
| SahR Middle F       | TAATACGACTCACTATAGGGAGTATTTCAAGGCTTTGTCCGAT                                    |
| SahR Rev 2          | GCGTCTCATCCGACAAAGCCTTGAAATACT                                                 |
| SahR Rev 3          | CCGACAGTTCATGACGGTTGAGCACATG                                                   |
| Dv sRNA-2 T7 prom F | TAATACGACTCACTATAGGGAGGAGCCGGTCTTGATGGTCAT                                     |
| Dv sRNA-2 T7 prom R | CCCGGAGGCTTCGAGGAAGGAACA                                                       |
| DVU0277 qRT-PCR F   | GACACCCTGCATCGTTATGA                                                           |
| DVU0277 qRT-PCR R   | CCCATCACAGTGGAGAAGATAC                                                         |
| DVU1165 qRT-PCR F   | GAAGGATGTGGAGGTGATGTT                                                          |
| DVU1165 qRT-PCR R   | CTATCTGTTCCGGCTCAAGTT                                                          |
| DVU1362 qRT-PCR F   | GCTTCTCTCCCGTGTTC                                                              |

|                               |                                             |
|-------------------------------|---------------------------------------------|
| DVU1362 qRT-PCR R             | GCCAGTATCTTGACCGTGAT                        |
| DVU1411 qRT-PCR F             | TCCGTCCCACCCTTCTT                           |
| DVU1411 qRT-PCR R             | CACCTTCTGCATTTTCGCATTC                      |
| DVU1977 qRT-PCR F             | GGCGACATGGTGCTGTT                           |
| DVU1977 qRT-PCR R             | TACTCGATGATGGCGAGGAT                        |
| DVU 2373 qRT-PCR F            | CATCTGGGATCTCGGCTATTTTC                     |
| DVU2373 qRT-PCR R             | GAGCCTTCGATGACGATGTT                        |
| DVU2514 qRT-PCR F             | CATCTTCCGCCTCAACTTCT                        |
| DVU2514 qRT-PCR R             | CGATTTTCGCCTATCCGTATCTT                     |
| DVU2938 qRT-PCR F             | CCCACCATCAAGACGTCGAA                        |
| DVU2938 qRT-PCR R             | TCCGGGGTAGACCTTGTTCA                        |
| DVU3156 qRT-PCR F             | AAATCCAACGACGGTTCTCTC                       |
| DVU3156 qRT-PCR R             | TCTCGGAGTGGAAGACGTAG                        |
| rplS qRT-PCR F from ref. (59) | TGTCTTCCCCCTGCACTCG                         |
| rplS qRT-PCR R from ref. (59) | CTTGATGCGGGCAGCCTTAC                        |
| Xba-c3pro-F                   | GAGCTCTAGAGTCCCAAACCGCCATGAATCTAG           |
| c3proBamSca-R                 | TATTAGTACTATATGGATCCCCCAAGCGGGATGGTATTGTGTC |
| DseA-pSIL300-BamHI-F          | AATAGGATCCACTCATGACGAGGGTGCGAG              |
| DseA-pSIL300-R                | AAAAAACCTCCCCAACCAACG                       |



**TABLE S3.** IntraRNA predicted targets of DseA.

| Target  | Energy kcal/mol | Gene         | Annotation                                                          |
|---------|-----------------|--------------|---------------------------------------------------------------------|
| DVU2373 | -25.6163        |              | OMP85 family outer membrane protein                                 |
| DVU0277 | -24.8905        |              | AraC family transcriptional regulator                               |
| DVU1165 | -21.5161        |              | pyridine nucleotide-disulfide oxidoreductase                        |
| DVU2594 | -21.4385        |              |                                                                     |
| DVU1977 | -19.828         | <i>groES</i> | co-chaperonin GroES                                                 |
| DVU1362 | -19.4161        |              |                                                                     |
| DVU3156 | -19.2118        | <i>glmS</i>  | glucosamine--fructose-6-phosphate aminotransferase (isomerizing)    |
| DVU0606 | -19.1926        |              | ArsR family transcriptional regulator                               |
| DVU2514 | -19.1684        | <i>pyk</i>   | pyruvate kinase                                                     |
| DVU2605 | -18.978         |              |                                                                     |
| DVU1411 | -18.8335        | <i>thiC</i>  | thiamine biosynthesis protein ThiC                                  |
| DVU1902 | -18.7894        |              |                                                                     |
| DVU2623 | -18.7117        |              |                                                                     |
| DVU2620 | -18.6032        |              |                                                                     |
| DVU0297 | -17.9608        |              |                                                                     |
| DVU1923 | -17.919         | <i>hupD</i>  | hydrogenase expression/formation protein HupD                       |
| DVU2282 | -17.8726        |              |                                                                     |
| DVU1824 | -17.7374        |              |                                                                     |
| DVU0917 | -17.5822        | <i>atpE</i>  | ATP synthase F0 subunit C                                           |
| DVU2331 | -17.4978        |              | Smr family protein                                                  |
| DVU2938 | -15.539         |              | DUF39, predicted homocysteine formation from aspartate semialdehyde |
